# Supplementary material for: Nickel pyrophosphate combined with graphene nanoribbon used as efficient catalyst for OER
Source: Royal Society of Chemistry journal article supplement (doi:10.1039/d1ta00817j), 2021-01-01
Supplement: d1ta00817j1.pdf [file d1ta00817j1.pdf]

Supporting Information for:

## Nickel pyrophosphate combined with graphene nanoribbon used as efficient catalyst for OER

*Alan S. Souza,<sup>a</sup> Leticia S. Bezerra,<sup>a</sup> Eduardo S. F. Cardoso,<sup>a</sup> Guilherme V. Fortunato,<sup>a,b</sup>  
and Gilberto Maia<sup>a,\*</sup>*

<sup>a</sup>Institute of Chemistry, Federal University of Mato Grosso do Sul; Av. Senador Filinto Muller, 1555; Campo Grande, MS 79074-460, Brazil

<sup>b</sup>Institute of Chemistry of São Carlos, University of São Paulo, Avenida Trabalhador São-Carlense 400, São Carlos, SP 13566-590, Brazil

\*Corresponding Author. E-mail: gilberto.maia@ufms.br

Tel.: +55 67 3345 3551. Fax: +55 67 3345 3552.

### *KOH electrolyte purification*<sup>1</sup>

In a 50 mL polypropylene centrifuge tube previous cleaned with H<sub>2</sub>SO<sub>4</sub> was added 2 g of NiCl<sub>2</sub> solubilized in 4 mL of ultrapure water followed by the addition of 1 M KOH to precipitate pure Ni(OH)<sub>2</sub>, followed by shaken and centrifugation. The Ni(OH)<sub>2</sub> precipitated underwent six washing cycles with the addition to the tube of 20 mL of ultrapure water plus 2 mL of 1 M KOH, each cycle redispersing the Ni(OH)<sub>2</sub>, centrifuging, and decanting the Ni(OH)<sub>2</sub>. Finally was added 50 mL of 1 M KOH for purification in the polypropylene centrifuge tube containing only the cleaned Ni(OH)<sub>2</sub>, redispersing by mechanical and sonication agitation for at least 30 min followed by rest at least for 3 hours, and finally centrifugation. The purified 1 M KOH supernatant was ready to use.<sup>1</sup>

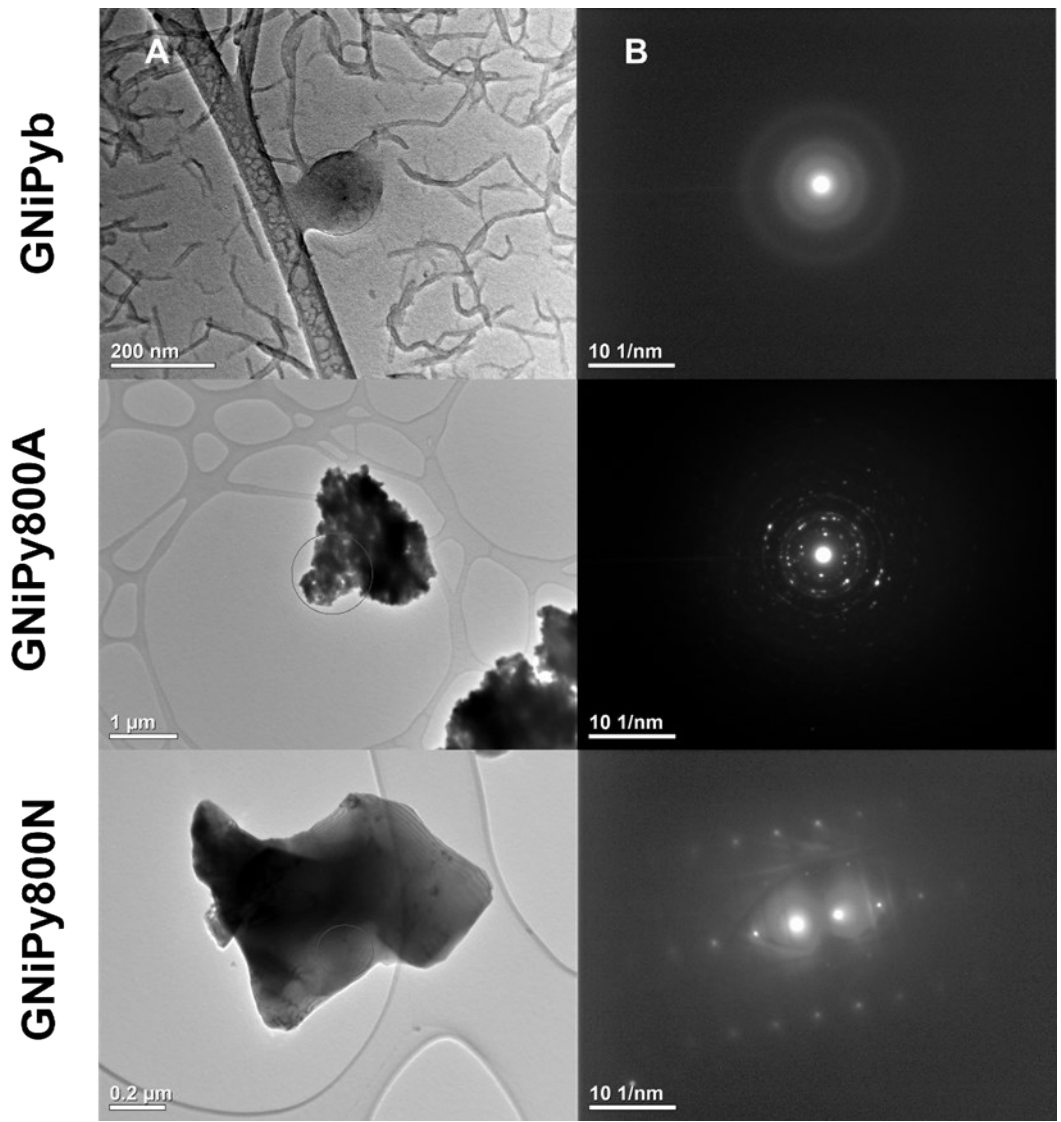

**Figure S1.** TEM images (A) and electron diffraction patterns (B) for the GNiPyb, GNiPy800A, and GNiPy800N nanocomposites.

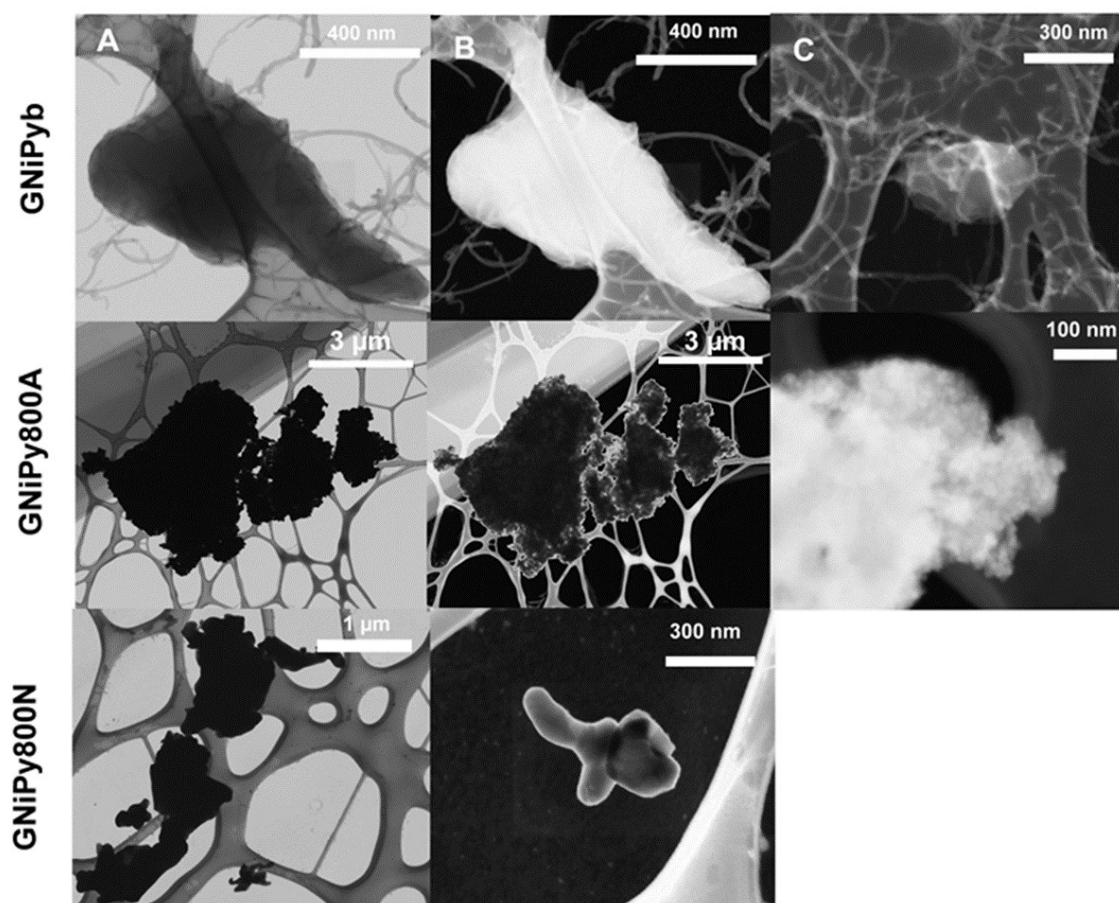

**Figure S2.** BF-STEM (A), DF-STEM (B), and HAADF-STEM (C) for the GNiPyb, GNiPy800A, and GNiPy800N nanocomposites.

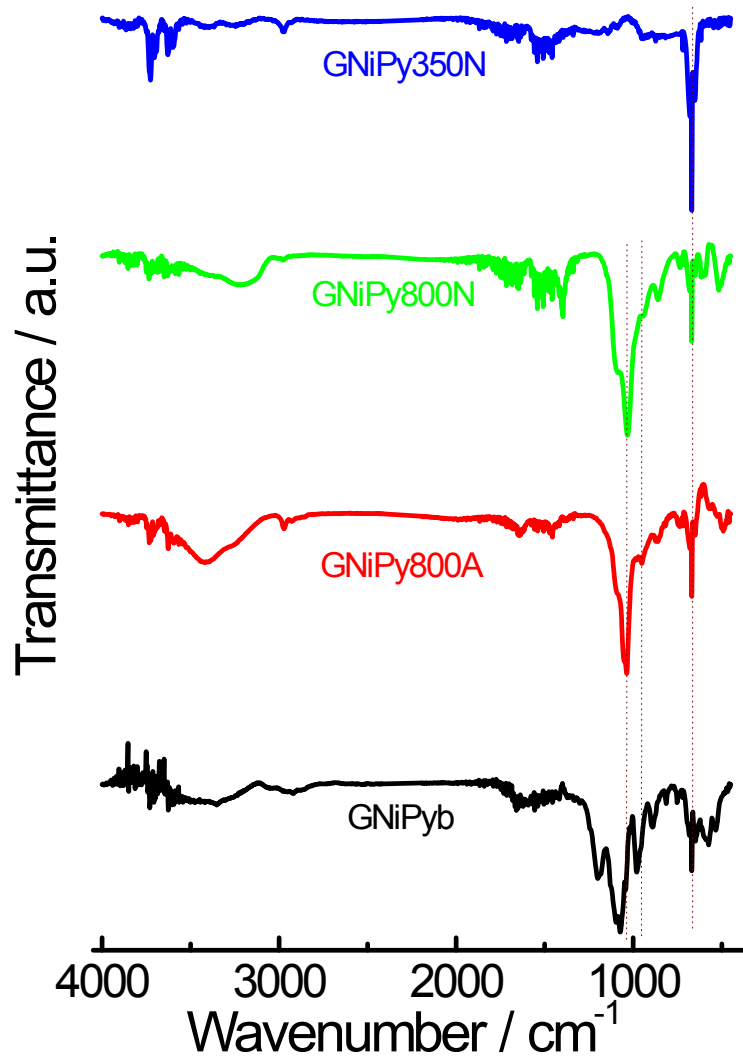

**Figure S3.** FT-IR spectra for the GNiPyb, GNiPy800A, GNiPy800N, and GNiPy350N nanocomposites.

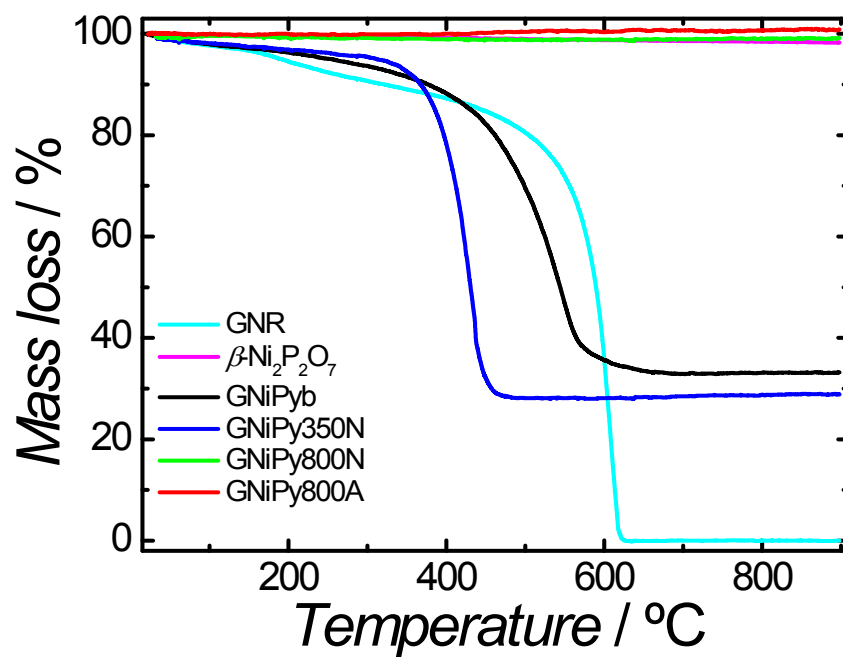

**Figure S4.** TG curves for the GNR,  $\beta\text{-Ni}_2\text{P}_2\text{O}_7$ , and GNiPyb, GNiPy350N, GNiPy800N, and GNiPy800A nanocomposites.

**Table S1.** EDX of mass composition and TG of unburned mass, and TG and EDX mass percentages of GNiPyb, GNiPy800A, GNiPy800N, and GNiPy350N nanocomposites.

| Catalyst  | EDX mass (%) | TG (mass unburned) (%) | TG and EDX mass (%) |
|-----------|--------------|------------------------|---------------------|
| GNiPyb    | 37.9 Ni      | 33.1                   | 12.6 Ni             |
|           | 19.4 P       |                        | 6.4 P               |
|           | -            |                        | 66.9 C              |
|           | 42.7 O       |                        | 14.1 O              |
| GNiPy800A | 65.4 Ni      | 100                    | 65.4 Ni             |
|           | 0.5 P        |                        | 0.5 P               |
|           | -            |                        | 0 C                 |
|           | 34.1 O       |                        | 34.1 O              |
| GNiPy800N | 65.4 Ni      | 100                    | 65.4 Ni             |
|           | 4.7 P        |                        | 4.7 P               |
|           | -            |                        | 0 C                 |
|           | 29.9 O       |                        | 29.9 O              |
| GNiPy350N | 64.7 Ni      | 29.6                   | 19.2 Ni             |
|           | 0.5 P        |                        | 0.1 P               |
|           | -            |                        | 70.4 C              |
|           | 34.8 O       |                        | 10.3 O              |

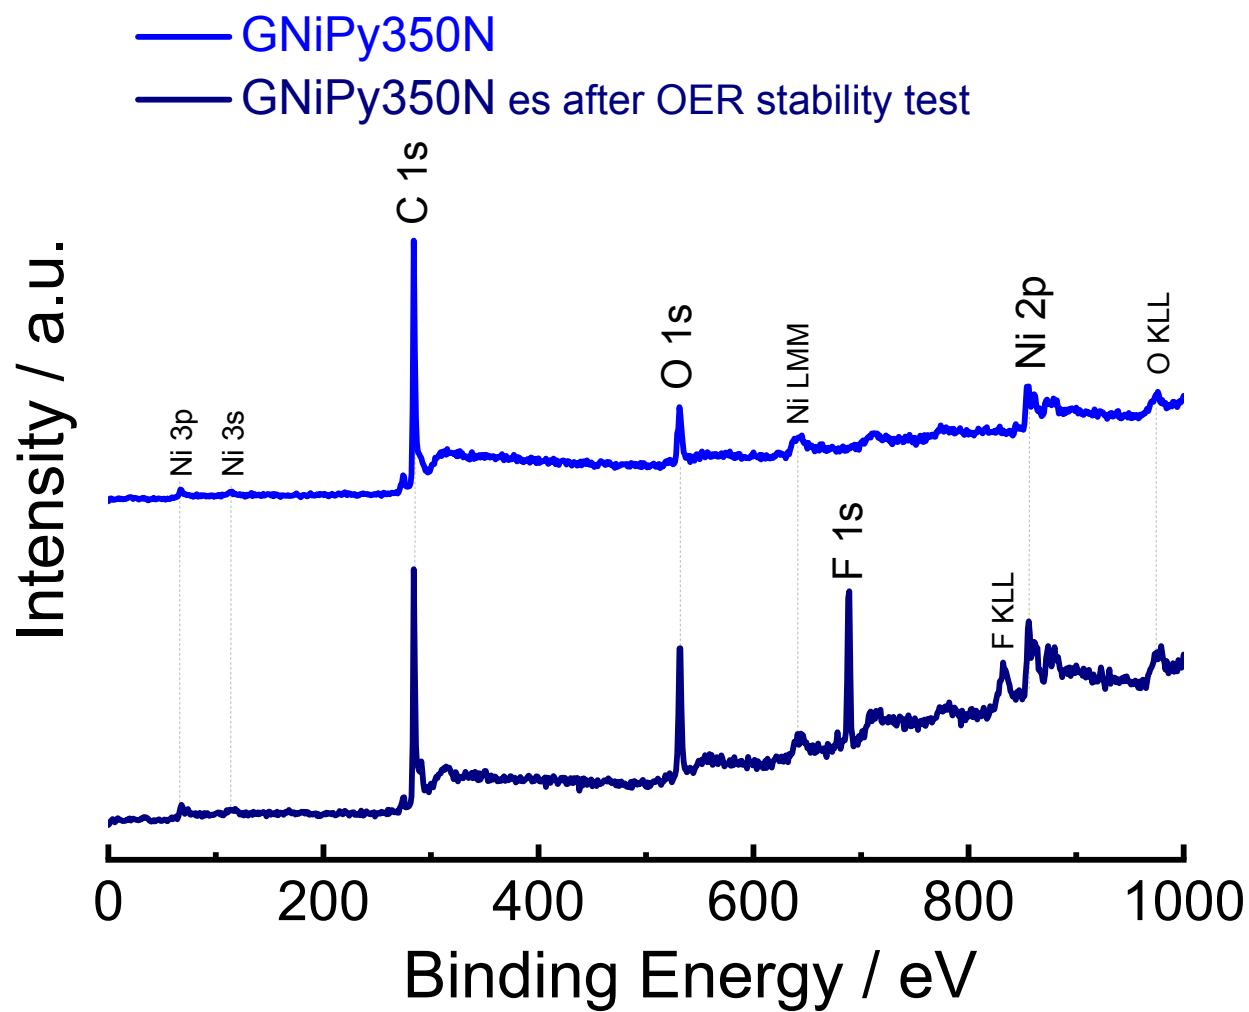

**Figure S5.** XPS survey spectra of the GNiPy350N nanocomposites.



**Table S2.** Positions, relative sensitive factors (R.S.F.), atomic and mass percentages obtained from the XPS spectra shown in Figure S5 for the GNiPy350N nanocomposites.

| <b>Catalyst</b>  | <b>Name</b> | <b>Position<br/>(eV)</b> | <b>R.S.F.</b> | <b>Content (at.<br/>%)</b> | <b>Content<br/>(mass %)</b> |
|------------------|-------------|--------------------------|---------------|----------------------------|-----------------------------|
| <b>GNiPy350N</b> | O 1s        | 531                      | 2.93          | 10.25                      | 11.88                       |
|                  | C 1s        | 284                      | 1             | 86.79                      | 75.52                       |
|                  | Ni 2p       | 854                      | 22.2          | 2.96                       | 12.6                        |

**Table S3.** Positions, relative sensitive factors (R.S.F.), atomic and mass percentages obtained from the XPS spectra shown in Figure S5 for the es GNiPy350N nanocomposites.

| <b>Catalyst</b>  | <b>Name</b> | <b>Position<br/>(eV)</b> | <b>R.S.F.</b> | <b>Content<br/>(at.%)</b> | <b>Content<br/>(mass %)</b> |
|------------------|-------------|--------------------------|---------------|---------------------------|-----------------------------|
| <b>GNiPy350N</b> | O 1s        | 531                      | 2.93          | 18.28                     | 19.69                       |
|                  | C 1s        | 284                      | 1             | 77.19                     | 62.41                       |
|                  | Ni 2p       | 856                      | 22.2          | 4.53                      | 17.9                        |

**Table S4.** Positions and percentages of content of functional groups or chemical states present in the GNiPy350N nanocomposite obtained from high-resolution XPS spectra shown in Figure 5.

| Catalyst  | Name  | Chemical state       | Position (eV) | % content |
|-----------|-------|----------------------|---------------|-----------|
| GNiPy350N | P 2p  | P 2p <sub>3/2</sub>  | 132.85        | 61.24     |
|           |       | P 2p <sub>1/2</sub>  | 133.78        | 38.76     |
|           | O 1s  | Ni–O                 | 529.07        | 23.65     |
|           |       | P–O                  | 530.57        | 29.22     |
|           |       | C=O                  | 531.46        | 20.68     |
|           |       | C–O                  | 532.66        | 19.59     |
|           |       | H <sub>2</sub> O     | 533.84        | 6.86      |
|           | C 1s  | C=C                  | 283.95        | 77.81     |
|           |       | C–C                  | 285.25        | 16.03     |
|           |       | C–OH & C–O           | 286.59        | 4.8       |
|           |       | C=O & COOH           | 288.41        | 1.36      |
|           | Ni 2p | Ni 2p <sub>3/2</sub> | 854.69        | 32.85     |
|           |       | satellite            | 860.71        | 35.05     |
|           |       | Ni 2p <sub>1/2</sub> | 872.37        | 14.53     |
| satellite |       | 878.78               | 17.58         |           |

**Table S5.** Positions and percentages of content of functional groups or chemical states present in the es GNiPy350N nanocomposite obtained from high-resolution XPS spectra shown in Figure 5.

| Catalyst             | Name  | Chemical state       | Position (eV) | % content |
|----------------------|-------|----------------------|---------------|-----------|
| GNiPy350N            | P 2p  | P 2p <sub>3/2</sub>  | 133.72        | 60.81     |
|                      |       | P 2p <sub>1/2</sub>  | 135.10        | 39.19     |
|                      | C 1s  | C=C                  | 283.96        | 73.42     |
|                      |       | C-C                  | 284.97        | 19.72     |
|                      |       | C-OH & C-O           | 286.4         | 4.3       |
|                      |       | C=O & COOH           | 288.17        | 2.56      |
|                      |       |                      |               |           |
|                      | O 1s  | Ni-O                 | 529.14        | 4.07      |
|                      |       | P-O                  | 530.76        | 30.04     |
|                      |       | C=O                  | 531.46        | 41.81     |
|                      |       | C-O                  | 532.65        | 16.63     |
|                      |       | H <sub>2</sub> O     | 533.85        | 7.46      |
|                      | Ni 2p | Ni 2p <sub>3/2</sub> | 855.87        | 31.94     |
|                      |       | satellite            | 861.61        | 31.9      |
| Ni 2p <sub>1/2</sub> |       | 873.45               | 14.35         |           |
| satellite            |       | 879.86               | 21.81         |           |

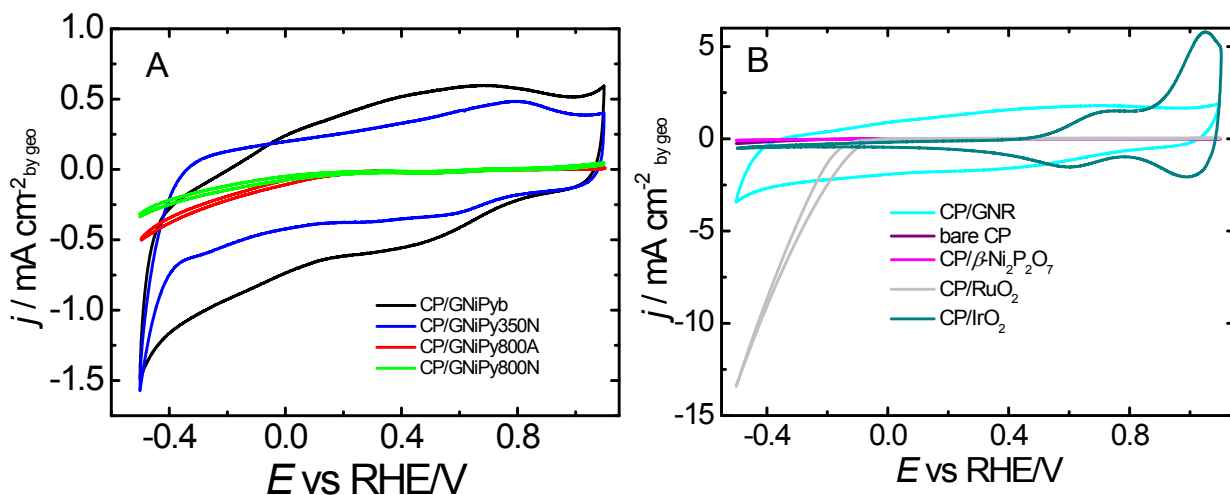

**Figure S6.** Cyclic voltammograms for bare and modified CP electrodes in  $\text{N}_2$ -saturated 1 M KOH solution. Potential scan rate:  $50 \text{ mV s}^{-1}$ . Scans were initiated at 1.1 V. The surfaces of the GNiPy350N and CP/IrO<sub>2</sub> electrodes were covered with 15  $\mu\text{L}$  of 0.1% Nafion solution.

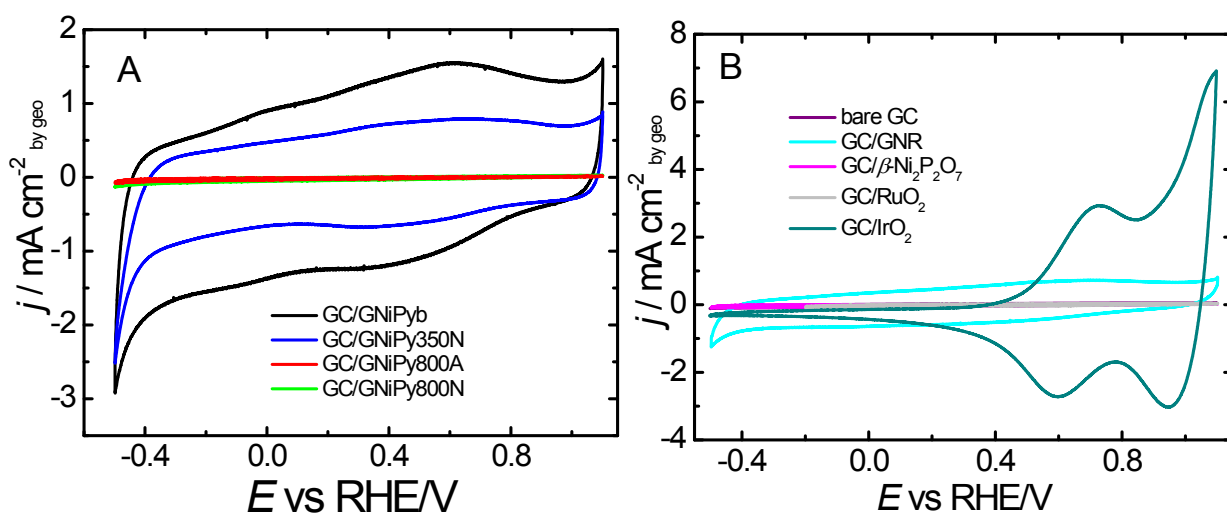

**Figure S7.** Cyclic voltammograms for bare and modified GC electrodes in  $\text{N}_2$ -saturated 1 M KOH solution. Potential scan rate:  $50 \text{ mV s}^{-1}$ . Scans were initiated at 1.1 V. The surfaces of the GC/GNiPy350 and GC/IrO<sub>2</sub> electrodes were covered with 5  $\mu\text{L}$  of 0.1% Nafion solution.

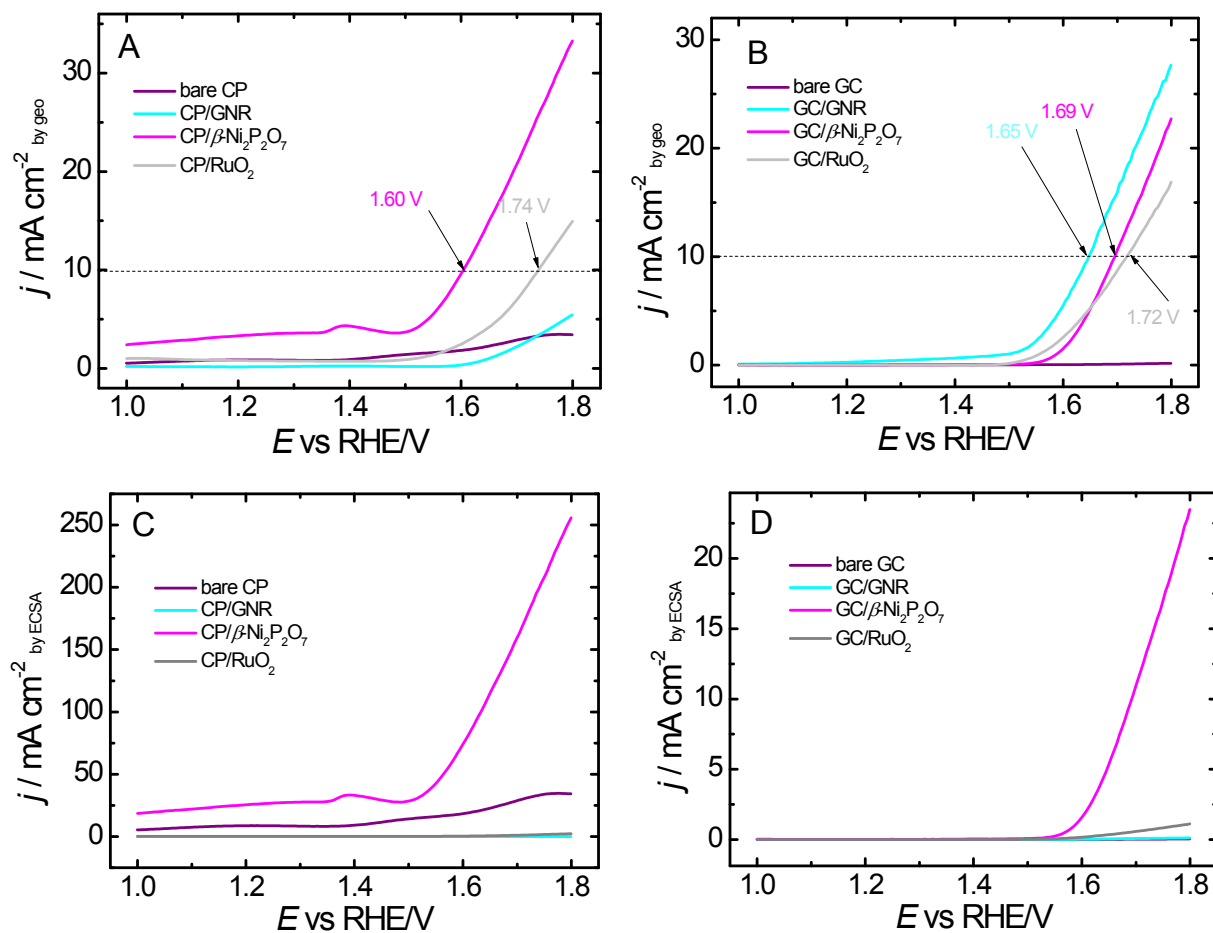

**Figure S8.** Stationary linear voltammograms recorded for bare and modified CP (A and C) and hydrodynamic linear voltammograms recorded for bare and modified GC electrodes (B and D) in  $O_2$ -saturated 1 M KOH solution, with  $v = 5 \text{ mVs}^{-1}$ . Scans were initiated at 1.0 V.

**Table S6.** Values related to overpotential at current density of  $10 \text{ mA cm}^{-2}$  ( $\eta_j$  at  $10 \text{ mA cm}^{-2}$  from Figures 6A and S8A), Tafel slopes (Figure S9), double layer capacitance ( $C_{dl}$ ) (obtained from Figures S15, S17, and S19), and electrochemically active surface area (ECSA) (obtained from Figures S16, S18, and S20) obtained for bare and modified CP electrodes. Catalysts loading =  $150 \mu\text{g cm}^{-2}$ .

| Electrode                                       | $\eta_j$ at<br>10<br>mA<br>$\text{cm}^{-2}$<br>(V) | Tafel<br>slope<br>(mV<br>$\text{dec}^{-1}$ ) | $R_{ct}$ ( $\Omega$ ) |              |                           | $C_{dl}$ ( $\mu\text{F}$ ) |              |                           | ECSA ( $\text{cm}^2$ ) |              |                           |
|-------------------------------------------------|----------------------------------------------------|----------------------------------------------|-----------------------|--------------|---------------------------|----------------------------|--------------|---------------------------|------------------------|--------------|---------------------------|
|                                                 |                                                    |                                              | Initial               | After<br>OER | After<br>OER<br>stability | Initial                    | After<br>OER | After<br>OER<br>stability | Initial                | After<br>OER | After<br>OER<br>stability |
| CP/ $\text{IrO}_2$                              | 0.30                                               | 59                                           | 1.7                   | 148          | high                      | 16000                      | 1660         | 408                       | 400                    | 41.5         | 2.7                       |
| CP/GNiPy350N                                    | 0.32                                               | 136                                          | 1.7                   | 6.6          | 4.3                       | 1270                       | 1320         | 608                       | 31.8                   | 33           | 15.2                      |
| CP/GNiPyb                                       | 0.37                                               | 150                                          | 0.7                   | 42           | high                      | 3170                       | 390          | 245                       | 79.3                   | 9.75         | 6.1                       |
| CP/ $\beta$ - $\text{Ni}_2\text{P}_2\text{O}_7$ | 0.37                                               | 205                                          | very<br>high          | 1140         | –                         | 5.1                        | 3.51         | -                         | 0.13                   | 0.09         | -                         |
| CP/GNiPy800A                                    | 0.39                                               | 168                                          | very<br>high          | very<br>high | high                      | 3.0                        | 6.8          | 97.9                      | 0.07                   | 0.17         | 0.23                      |
| CP/GNiPy800N                                    | 0.41                                               | 133                                          | 17.6                  | very<br>high | 359                       | 5.6                        | 32           | 7.07                      | 0.14                   | 0.80         | 0.19                      |
| CP/ $\text{RuO}_2$                              | 0.51                                               | 207                                          | 5.7                   | 32.5         | –                         | 265                        | 3.92         | –                         | 6.62                   | 0.10         | –                         |
| CP/GNR                                          | –                                                  | 112                                          | 0.7                   | high         | –                         | 8550                       | 3910         | –                         | 214                    | 97.7         | –                         |
| bare CP                                         | –                                                  | 474                                          | very<br>high          | very<br>high | –                         | 3.92                       | 3.92         | –                         | 0.10                   | 0.10         | –                         |

**Table S7.** Values related to overpotential at current density of  $10 \text{ mA cm}^{-2}$  ( $\eta_j$  at  $10 \text{ mA cm}^{-2}$  from Figures 6B and S8B), Tafel slopes (Figure S10), double layer capacitance ( $C_{dl}$ ) (obtained from Figures S21 and S23), and electrochemically active surface area (ECSA) (obtained from Figures S22 and S24) obtained for bare and modified GC electrodes. Catalysts loading =  $150 \mu\text{g cm}^{-2}$ .

| Electrode                                                  | $\eta_j$ at $10 \text{ mA cm}^{-2}$ (V) | Tafel slope (mV $\text{dec}^{-1}$ ) | $R_{ct}$ ( $\Omega$ ) |           | $C_{dl}$ ( $\mu\text{F}$ ) |           | ECSA ( $\text{cm}^2$ ) |           |
|------------------------------------------------------------|-----------------------------------------|-------------------------------------|-----------------------|-----------|----------------------------|-----------|------------------------|-----------|
|                                                            |                                         |                                     | Initial               | After OER | Initial                    | After OER | Initial                | After OER |
| GC/IrO <sub>2</sub>                                        | 0.25                                    | 52.2                                | 1.8                   | 2.5       | 4420                       | 1560      | 111                    | 39.0      |
| GC/GNiPy350N                                               | 0.34                                    | 50.7                                | 3.3                   | 7.8       | 1320                       | 175       | 33.0                   | 4.40      |
| GC/GNiPyb                                                  | 0.42                                    | 74.9                                | 0.7                   | 3.6       | 581                        | 123       | 14.5                   | 3.10      |
| GC/ $\beta$ -Ni <sub>2</sub> P <sub>2</sub> O <sub>7</sub> | 0.46                                    | 80.1                                | very high             | high      | 7.73                       | 10        | 0.19                   | 0.25      |
| GC/GNiPy800A                                               | 0.38                                    | 74.1                                | very high             | very high | 8.08                       | 9.55      | 0.20                   | 0.24      |
| GC/GNiPy800N                                               | 0.46                                    | 128                                 | very high             | very high | 20                         | 18.1      | 0.50                   | 0.45      |
| GC/RuO <sub>2</sub>                                        | 0.46                                    | 124                                 | 11.7                  | 1.2       | 119                        | 123       | 2.97                   | 3.10      |
| GC/GNR                                                     | 0.42                                    | 115                                 | 6.6                   | high      | 1850                       | 2.46      | 46.2                   | 6.15      |
| bare GC                                                    | –                                       | 339                                 | very high             | high      | 29.6                       | 25.8      | 0.74                   | 0.64      |

**Table S8.** Summary of results related to OER activity obtained for the pyrophosphates investigated in the present study and the results reported by studies published in the literature.

| Catalyst                                                                          | Loading<br>( $\mu\text{g cm}^{-2}$ ) | $\eta_j$ at 10<br>$\text{mA cm}^{-2}$<br>(V) | Tafel<br>slope<br>( $\text{mV dec}^{-1}$ ) | Solution                                            | Synthesis method                                 | Ref.                     |
|-----------------------------------------------------------------------------------|--------------------------------------|----------------------------------------------|--------------------------------------------|-----------------------------------------------------|--------------------------------------------------|--------------------------|
| <b><math>\beta\text{-Ni}_2\text{P}_2\text{O}_7/\text{GNR}</math> - 350<br/>°C</b> | 150                                  | 0.32                                         | 68                                         | 1.0 M<br>KOH                                        | Calcination                                      | <b>Present<br/>study</b> |
| NFPy                                                                              | 255                                  | 0.29 upon<br>GC<br>surface                   | 47.4                                       | 1.0 M<br>KOH                                        | Stirring                                         | [2]                      |
| $\text{Na}_2\text{Ni}_{0.75}\text{Fe}_{0.25}\text{P}_2\text{O}_7\text{-}$<br>nano | 1,000                                | 0.30                                         | 110                                        | 0.1 M<br>KOH                                        | Annealed                                         | [3]                      |
| Ni–Co-<br>hydroxide/ $\text{Ni}_2\text{P}_2\text{O}_7$<br>nano-micro-structured   | Not<br>reported                      | 0.20 upon<br>Ni foam                         | 76                                         | 1.0 M<br>KOH                                        | Hydrothermal and<br>electrodeposition            | [4]                      |
| $\text{Fe-Ni}_2\text{P}@N, \text{PCNSs}$                                          | 127                                  | 0.39                                         | 96                                         | 0.1 M<br>KOH                                        | Calcination                                      | [5]                      |
| $\text{Ni}_2\text{P}_2\text{O}_7$ microsheets                                     | 1,500                                | 0.21 upon<br>highly<br>porous<br>surface     | 64.1                                       | 1.0 M<br>KOH                                        | Thermal treatment                                | [6]                      |
| $\text{Ni}_2\text{P}_2\text{O}_7 \cdot 8\text{H}_2\text{O}$                       | Not<br>reported                      | 0.24 upon<br>stainless<br>steel              | 51.5                                       | 1.0 M<br>KOH                                        | Chemical bath<br>deposition                      | [7]                      |
| $\text{Na}_2\text{CoP}_2\text{O}_7/\text{rGO}$ (50/50<br>wt%)                     | 1,717                                | 0.24                                         | 63                                         | 1.0 M<br>KOH                                        | Annealing                                        | [8]                      |
| $\text{Co}_2\text{P}_2\text{O}_7$                                                 | Not<br>reported                      | 0.27                                         | 59.8                                       | 1.0 M<br>KOH                                        | Hydrothermal                                     | [9]                      |
| NCFPO/C NPs                                                                       | 1,000                                | 0.30                                         | 47                                         | 0.1 M<br>KOH and<br>0.5 M<br>NaCl<br>+ 0.1 M<br>KOH | Sol–gel process<br>followed by heat<br>treatment | [10]                     |
| $\text{Co}_2\text{P}_2\text{O}_7@\text{N,P-C}$                                    | 500                                  | 0.27                                         | 49.1                                       | 1.0 M                                               | Pyrolysis                                        | [11]                     |



|                 |     |      |      |       |     |                                                                                    |      |
|-----------------|-----|------|------|-------|-----|------------------------------------------------------------------------------------|------|
|                 |     |      |      |       | KOH |                                                                                    |      |
| NMPy            | 140 | 0.47 | 64   | 0.1 M | KOH | Mechanochemical assisted solid-state synthesis and annealing                       | [12] |
| CoPi/NPGA       | 200 | 0.34 | 96   | 1.0 M | KOH | Hydrothermal process and subsequent pyrolysis strategy                             | [13] |
| CoPPi nanowires | 500 | 0.36 | 54.1 | 1.0 M | KOH | Low-temperature hydrothermal method                                                | [14] |
| CoHPi           | 200 | 0.31 | 31   | 1.0 M | KOH | Chemical conversion of $\alpha$ -Co(OH) <sub>2</sub> precursor at room temperature | [15] |
| CoNiPP-600      | 510 | 0.26 | 60   | 1.0 M | KOH | Hydrothermal method followed by annealing                                          | [16] |
| Co-Fe-Pyro      | 570 | 0.28 | 32   | 1.0 M | KOH | Co-precipitation method                                                            | [17] |

NFPy = porous iron-doped nickel pyrophosphate; Fe-Ni<sub>2</sub>P@N,PCNSs = Fe-Ni<sub>2</sub>P particles supported on N,P-codoped porous carbon nanosheets; Na<sub>2</sub>CoP<sub>2</sub>O<sub>7</sub>/rGO (50/50 wt%) = hollow spherical powder possessing nano-thick walls of sodium-cobalt pyrophosphate and reduced graphene oxide; Co<sub>2</sub>P<sub>2</sub>O<sub>7</sub> = cobalt pyrophosphate nanosheets; NCFPO/C NPs = carbon-coated sodium cobalt-iron pyrophosphate (Na<sub>2</sub>Co<sub>1-x</sub>Fe<sub>x</sub>P<sub>2</sub>O<sub>7</sub>/C, 0 ≤ x ≤ 1) nanoparticles; Co<sub>2</sub>P<sub>2</sub>O<sub>7</sub>@N,P-C = Co<sub>2</sub>P<sub>2</sub>O<sub>7</sub>@N, P co-doped carbon nanocages; NMPy = Na<sub>2</sub>MnP<sub>2</sub>O<sub>7</sub> pyrophosphate; CoPi/NPGA = N,P-codoped three-dimensional (3D) reduced graphene-oxide-aerogel-supported (rGOA-supported) Co<sub>2</sub>P<sub>2</sub>O<sub>7</sub> (CoPi) fine particles; CoPPi = cobalt pyrophosphate nanostructures; CoHPi = two-dimensional cobalt hydrogen phosphate; CoNiPP-600 = CoNiP<sub>2</sub>O<sub>7</sub> at T= 600 °C; Co-Fe-Pyro = cobalt iron pyrophosphate.

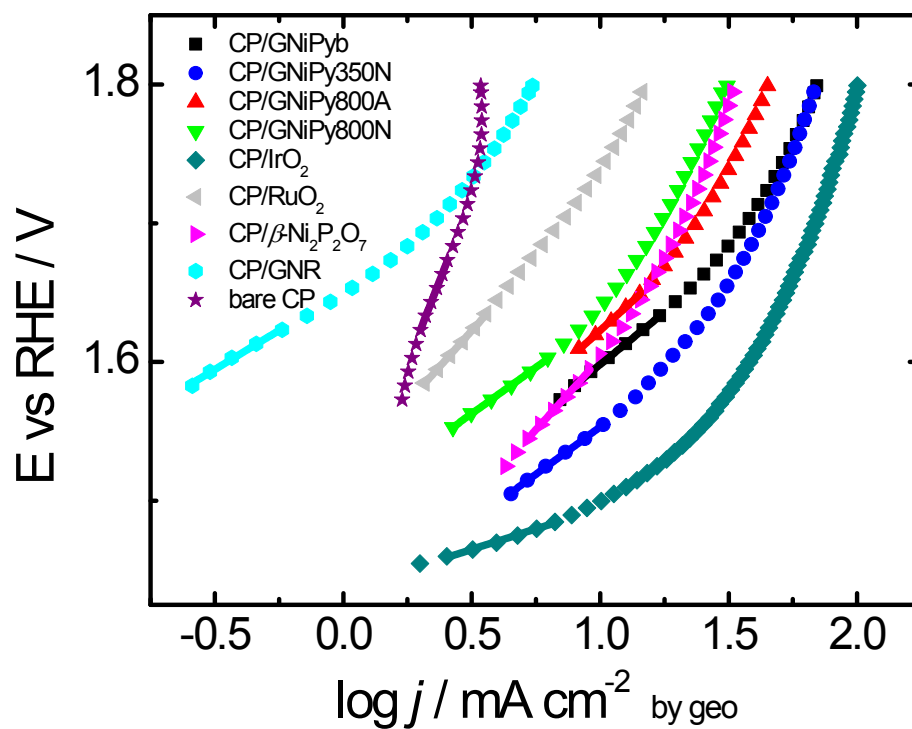

**Figure S9.** Tafel plots based on data (in OER) from Figures 6A and S8A for modified CP electrodes in O<sub>2</sub>-saturated 1.0 M KOH solution.

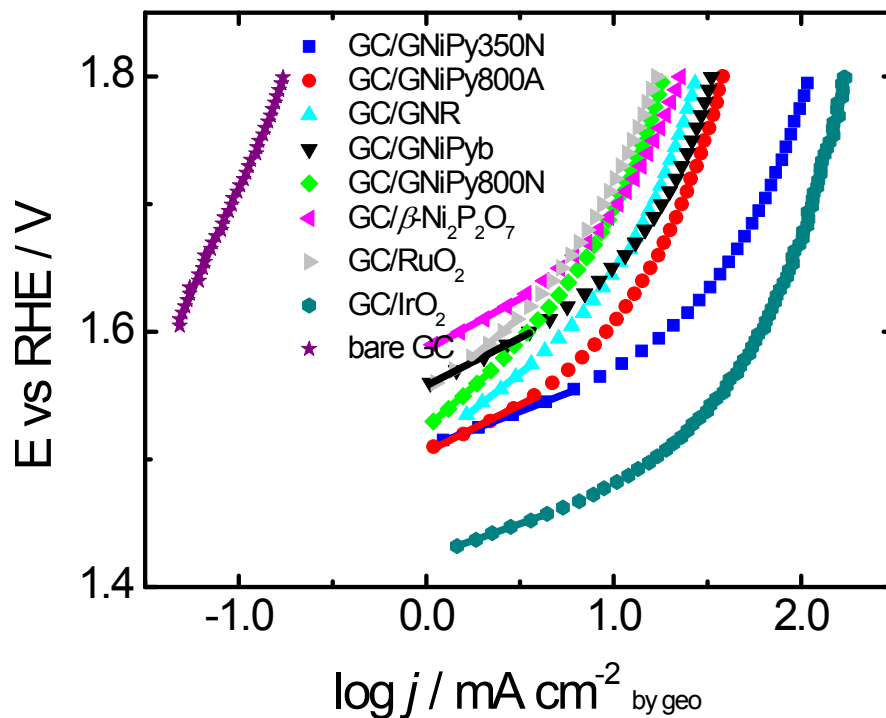

**Figure S10.** Tafel plots based on data (in OER) from Figures 6B and S8B for modified GC electrodes in O<sub>2</sub>-saturated 1.0 M KOH solution.

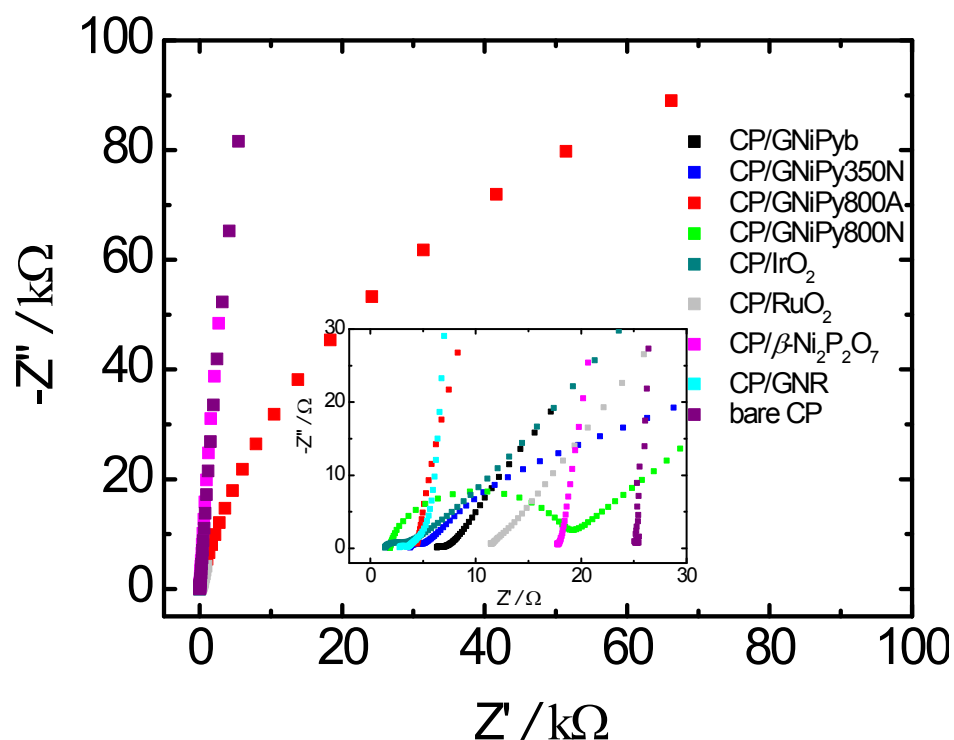

**Figure S11.** EIS results for bare and modified CP electrodes in  $N_2$ -saturated 1 M KOH solution, before OER. Potential perturbation: 10mV (rms). Frequency range: 100kHz – 10 mHz. Constant potential for EIS acquisition: OCP (0.83 V vs. RHE on average).

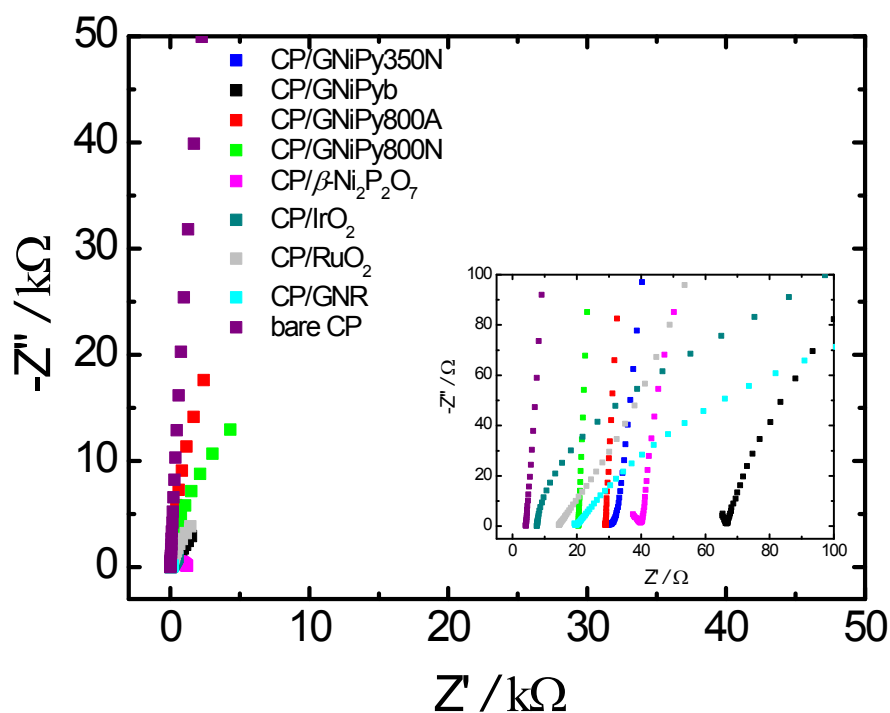

**Figure S12.** EIS results for bare and modified CP electrodes in  $N_2$ -saturated 1 M KOH solution after 3 consecutive OER analyses. Potential perturbation: 10mV (rms). Frequency range: 100kHz – 10 mHz. Constant potential for EIS acquisition: OCP (0.85 V vs. RHE on average).

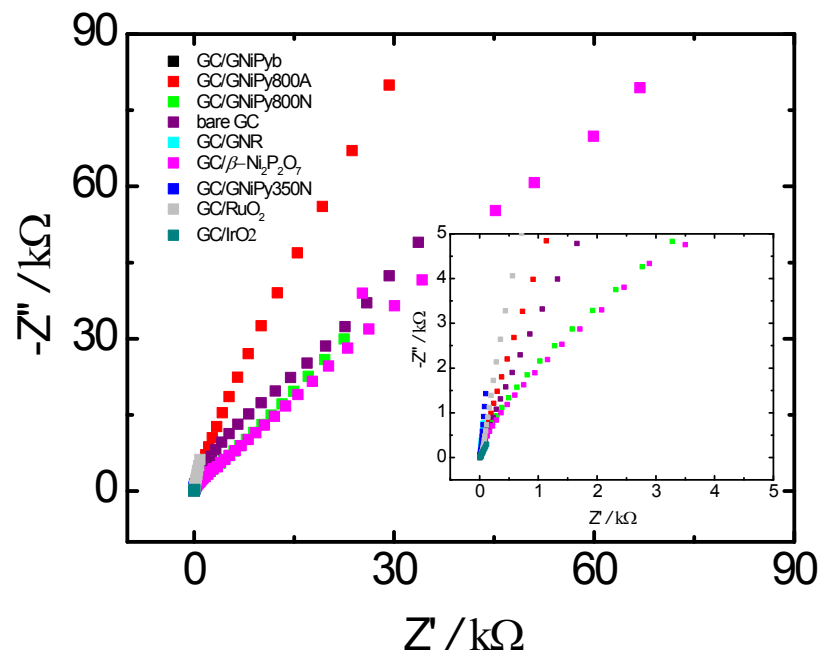

**Figure S13.** EIS results for bare and modified GC electrodes in  $N_2$ -saturated 1 M KOH solution, before OER. Potential perturbation: 10mV (rms). Frequency range: 100kHz – 10 mHz. Constant potential for EIS acquisition: OCP (0.88 V vs. RHE on average).

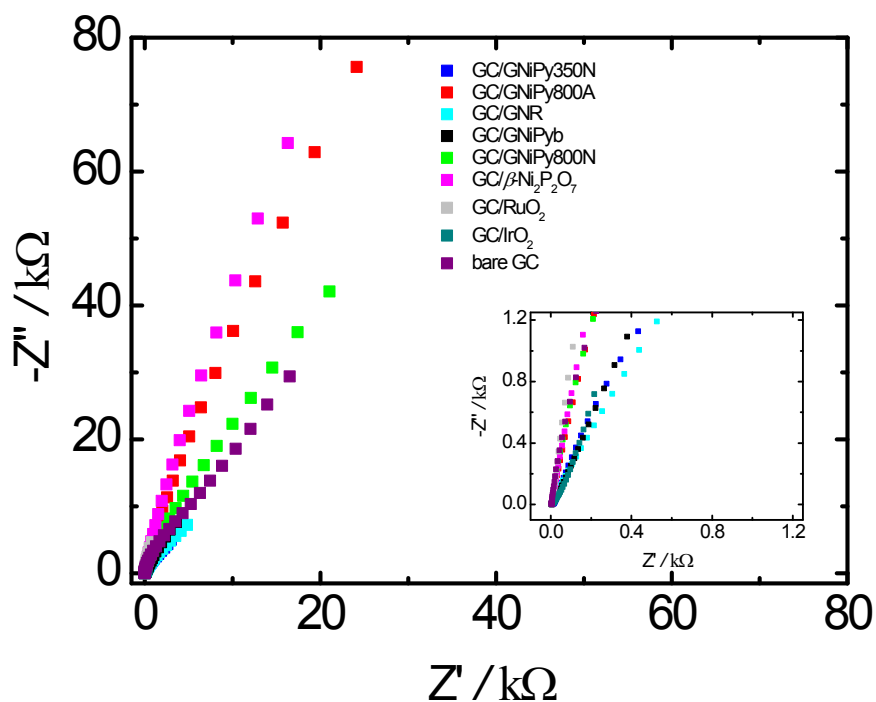

**Figure S14.** EIS results for bare and modified GC electrodes in  $N_2$ -saturated 1 M KOH solution after 3 consecutive OER analyses. Potential perturbation: 10mV (rms). Frequency range: 100kHz – 10 mHz. Constant potential for EIS acquisition: OCP (0.86 V vs. RHE on average).

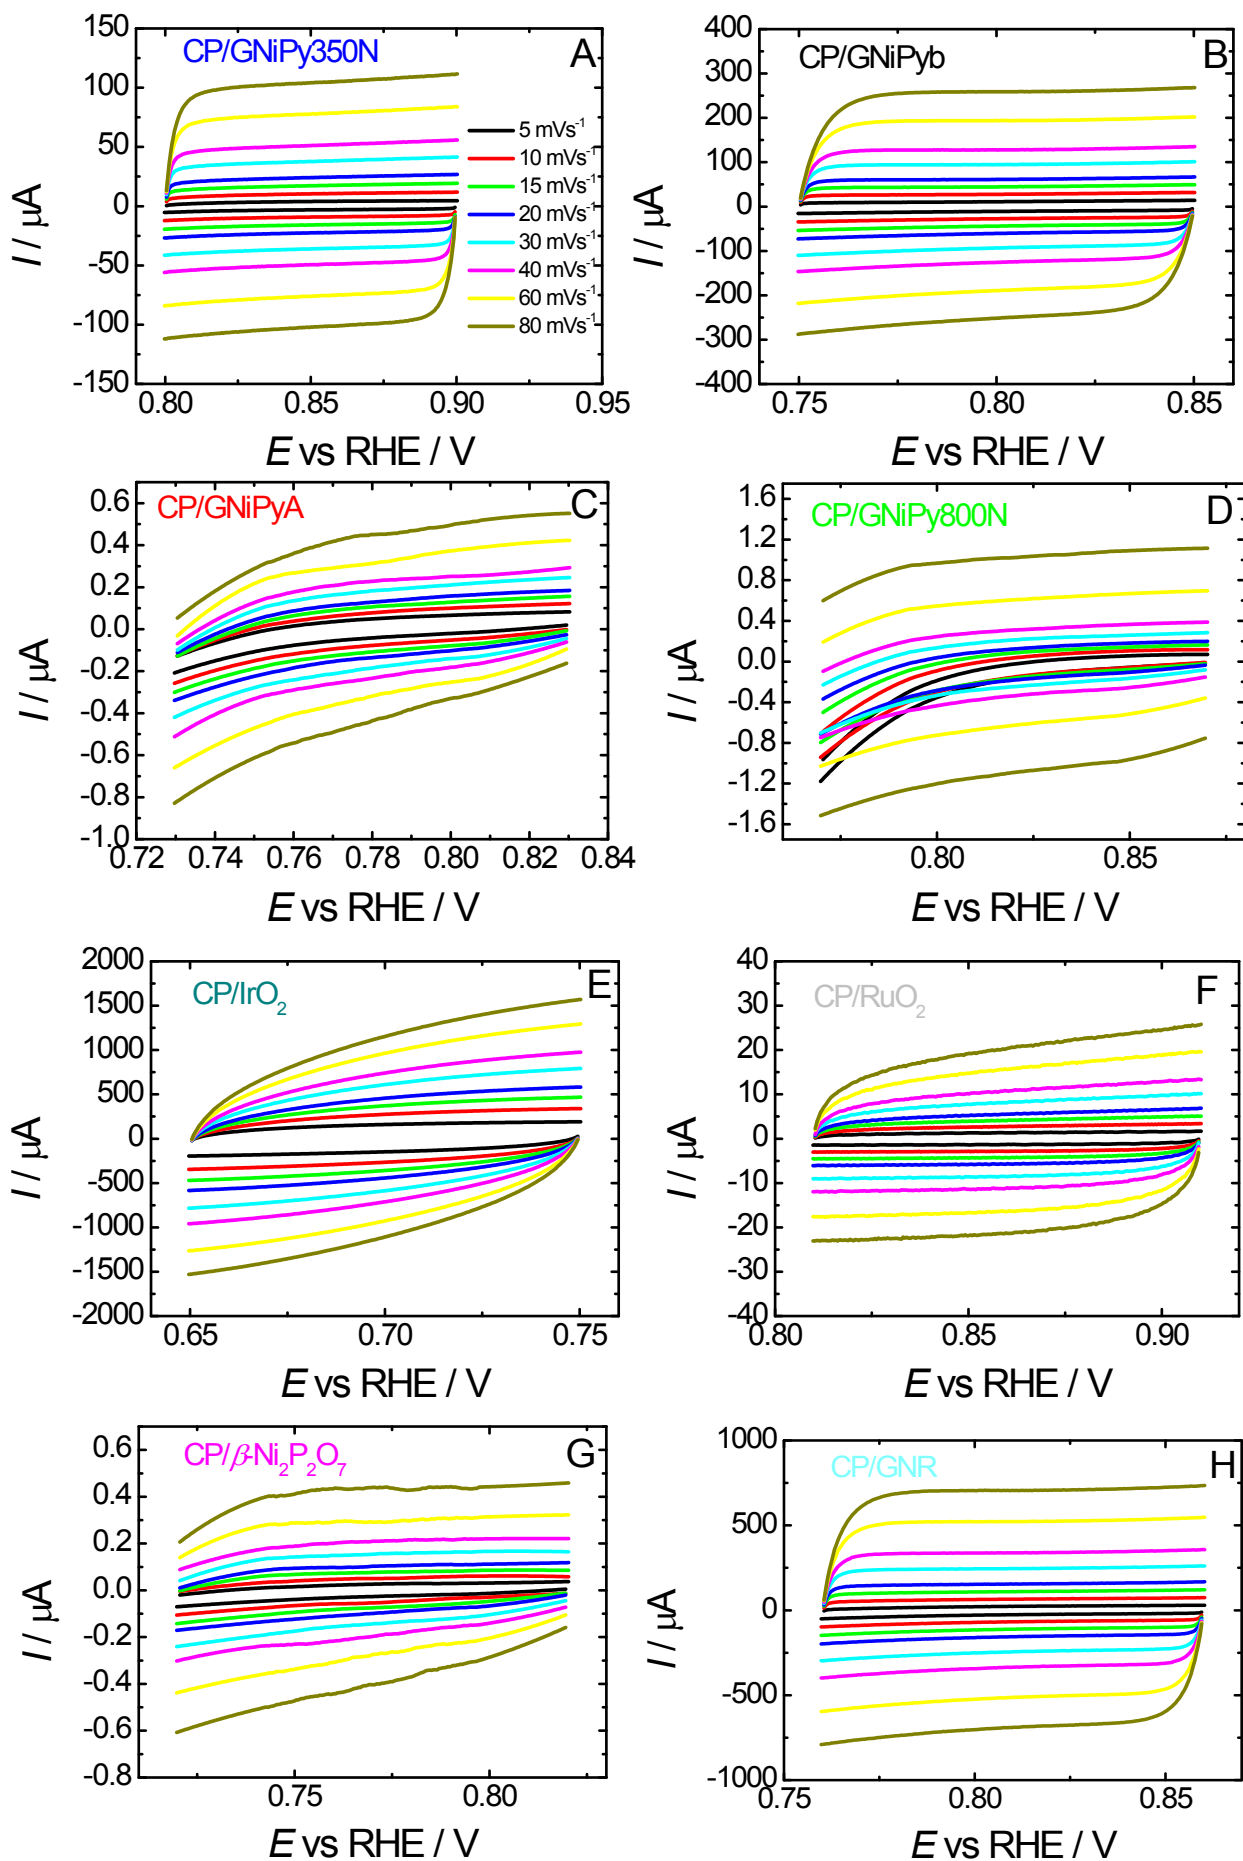

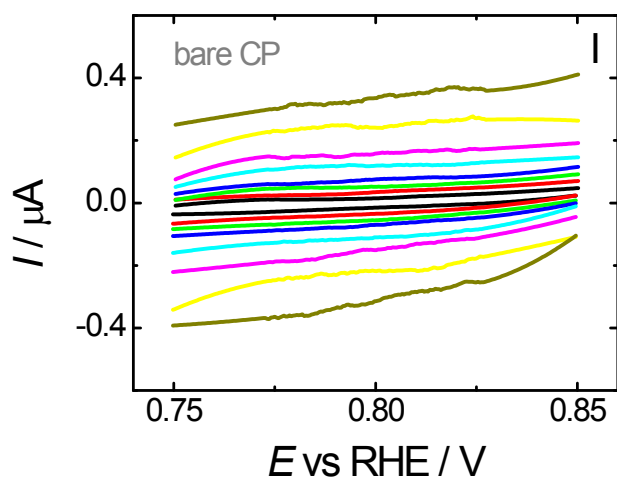

**Figure S15.** Cyclic voltammograms obtained in a non-Faradaic potential region – which also consisted of the open circuit potential (OCP) – for modified CP electrodes in  $N_2$ -saturated 1M KOH solution, before OER. The modified electrodes were kept in each vertex potential for 10 sec before the beginning of the next potential sweep. Scans were initiated at higher potentials.

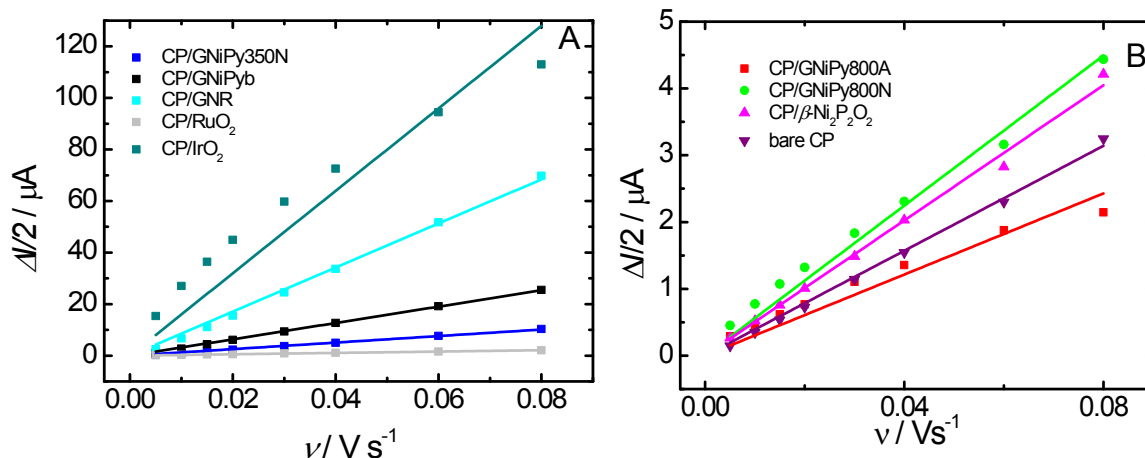

**Figure S16.** Plots related to differences between the anodic and the cathodic double layer charging currents (Figure S15, before OER) divided by 2 ( $\Delta I = (I_a - I_c)/2$ ), measured at the OCP, which is also in a non-Faradaic potential region, relative to the potential scan rates. The slopes of these plots yield the double-layer capacitance ( $C_{dl}$ ) values (see Table S6) used for determining the ECSA for the modified CP electrodes in  $N_2$ -saturated 1 M KOH solution.

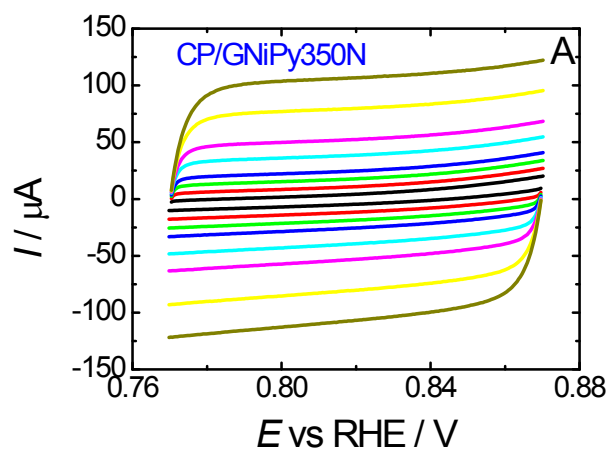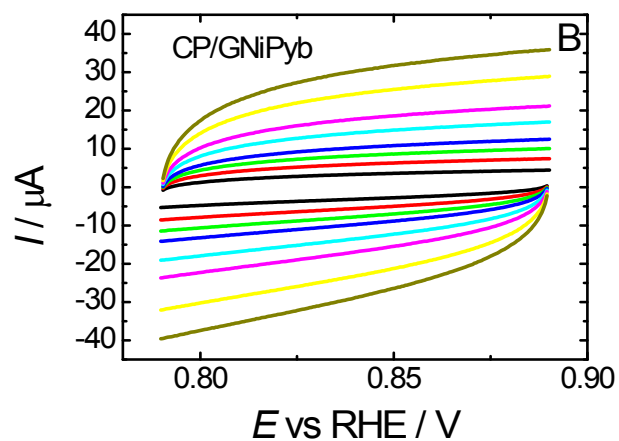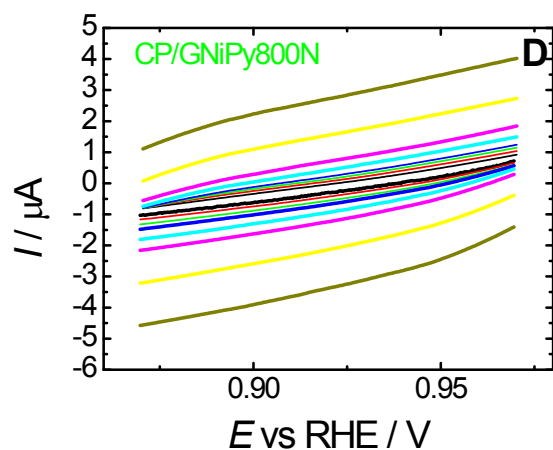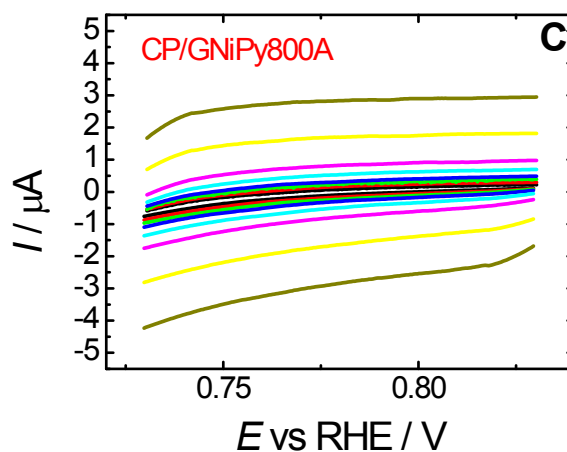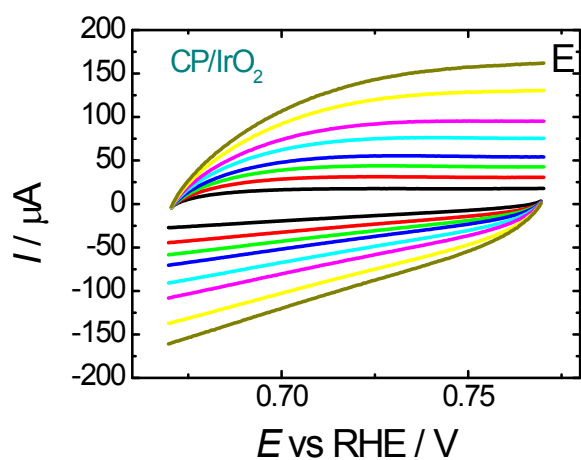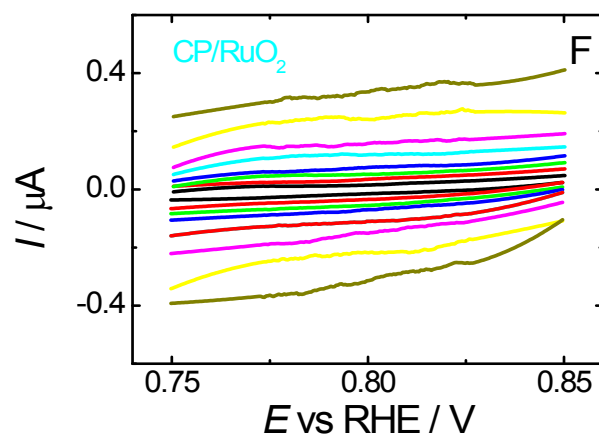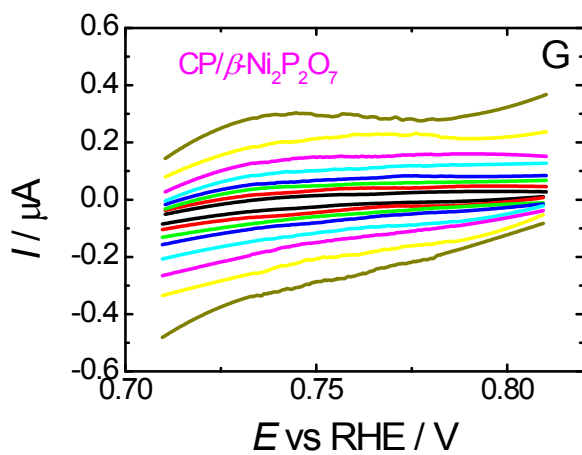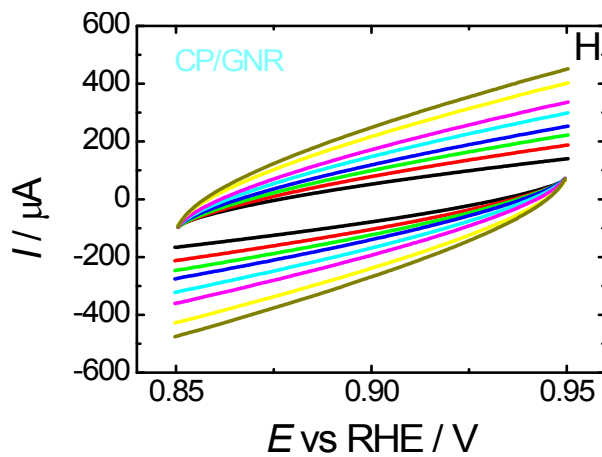

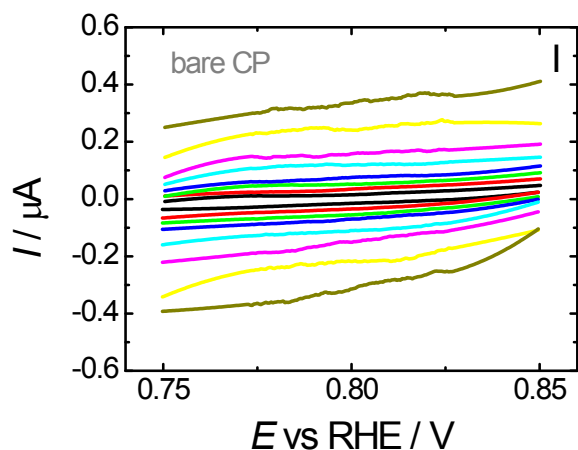

**Figure S17.** Cyclic voltammograms measured in a non-Faradaic potential region – which also consisted of the open circuit potential (OCP) – for modified CP electrodes in  $N_2$ -saturated 1M KOH solution, after OER. The modified electrodes were kept in each vertex potential for 10 sec before the onset of the next potential sweep. Scans were initiated at higher potentials.

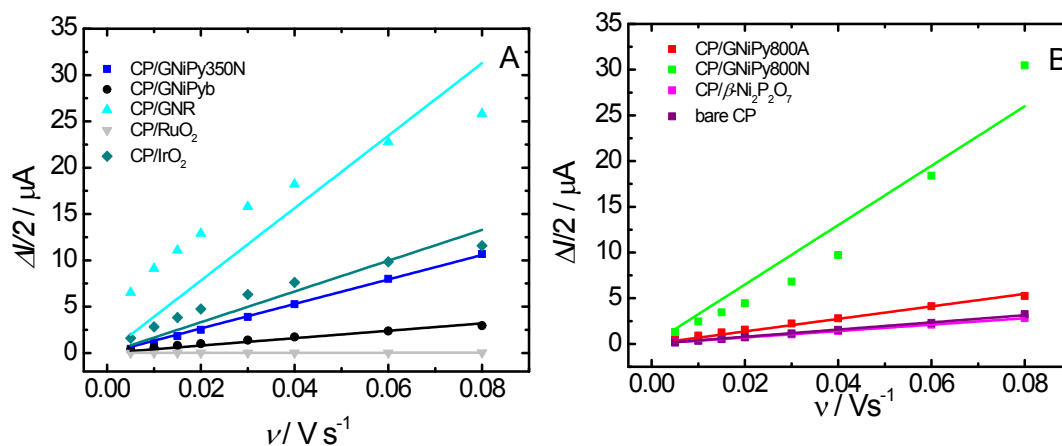

**Figure S18.** Plots related to differences between the anodic and the cathodic double layer charging currents (Figure S17, after OER) divided by 2 ( $\Delta I = I_a - I_c$ )/2), measured at the OCP, which is also in a non-Faradaic potential region, relative to the potential scan rates. The slopes of these plots yield the double-layer capacitance ( $C_{dl}$ ) values (see Table S6) used for determining the ECSA for the modified CP electrodes in  $N_2$ -saturated 1 M KOH solution.



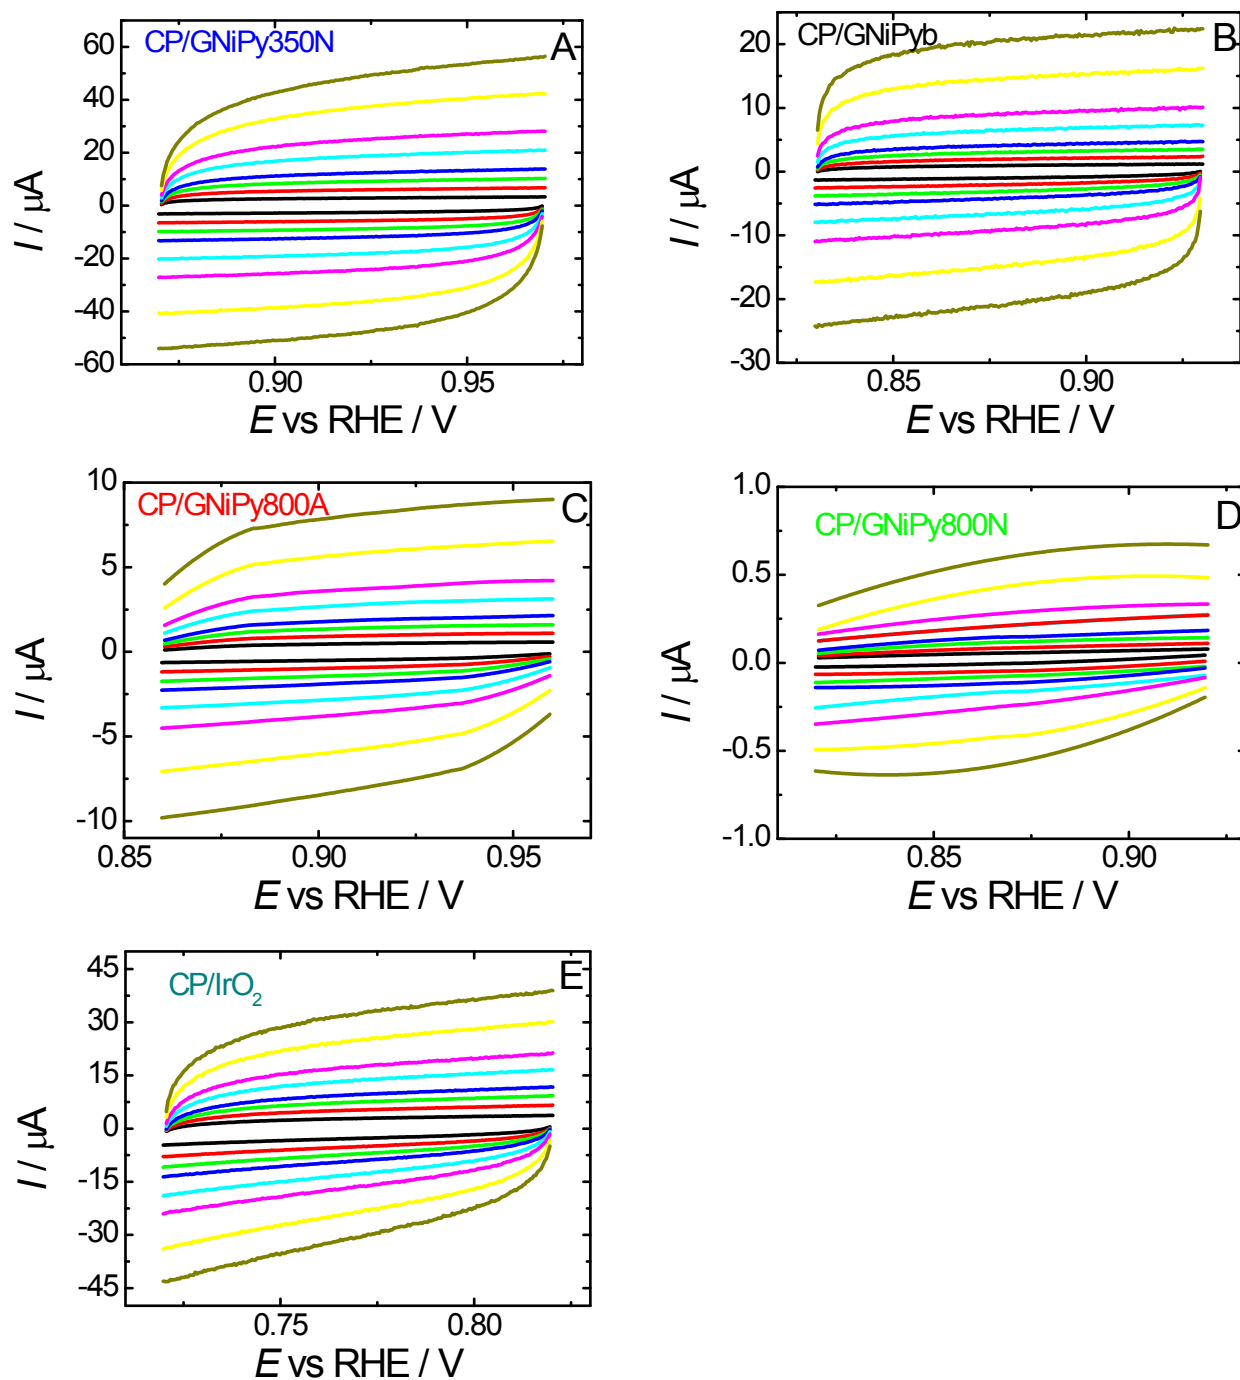

**Figure S19.** Cyclic voltammograms measured in a non-Faradaic potential region – which also consists of the open circuit potential (OCP) – for modified CP electrodes in  $N_2$ -saturated 1M KOH solution after OER stability test. The modified electrodes were kept in each vertex potential for 10 sec before the onset of the next potential sweep. Scans were initiated at higher potentials.

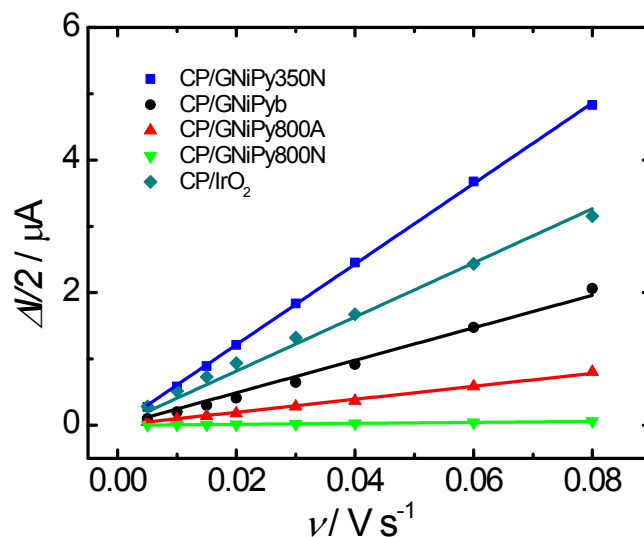

**Figure S20.** Plots related to differences between the anodic and the cathodic double layer charging currents (Figure S19, after OER stability test) divided by 2 ( $\Delta I = I_a - I_c$ )/2), measured at the OCP, which is also in a non-Faradaic potential region, relative to the potential scan rates. The slopes of these plots yield the double-layer capacitance ( $C_{dl}$ ) values (see Table S6) used for determining the ECSA for the modified CP electrodes in  $N_2$ -saturated 1 M KOH solution.

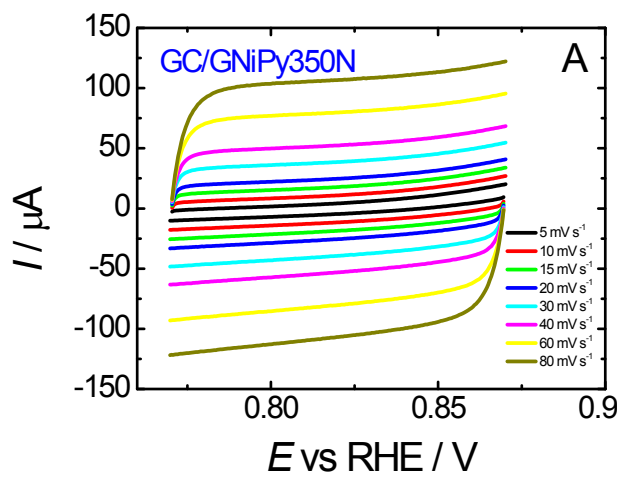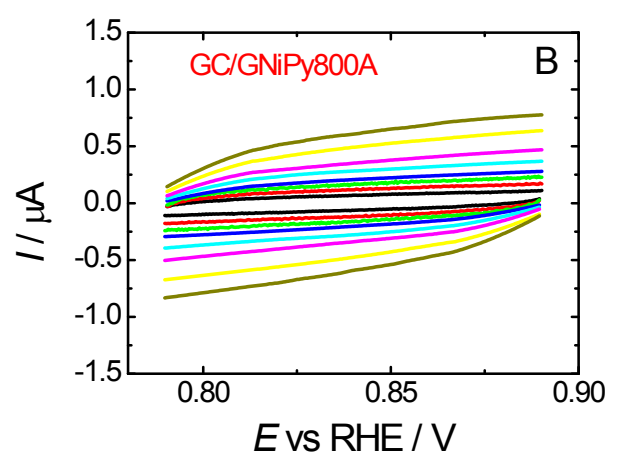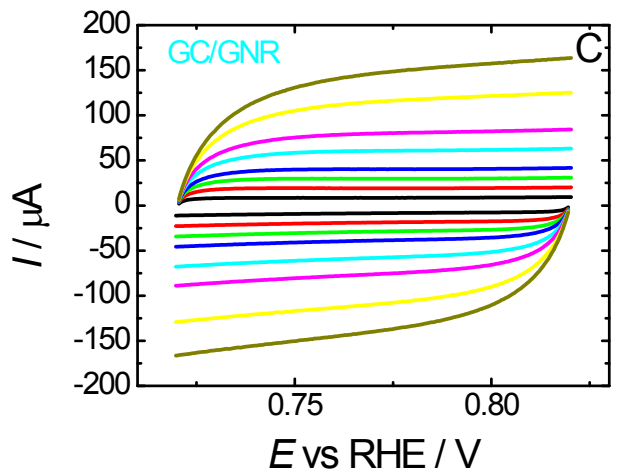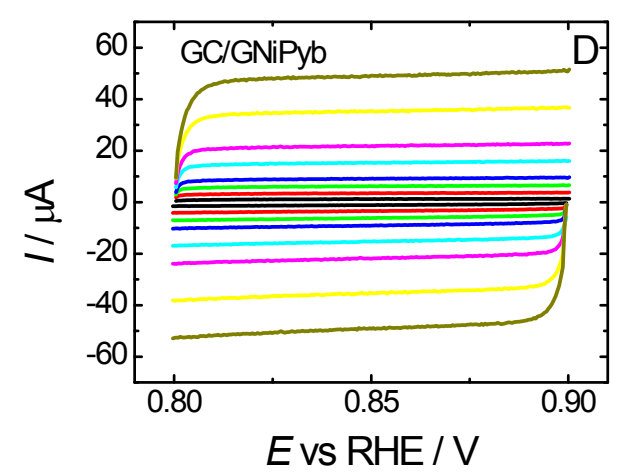

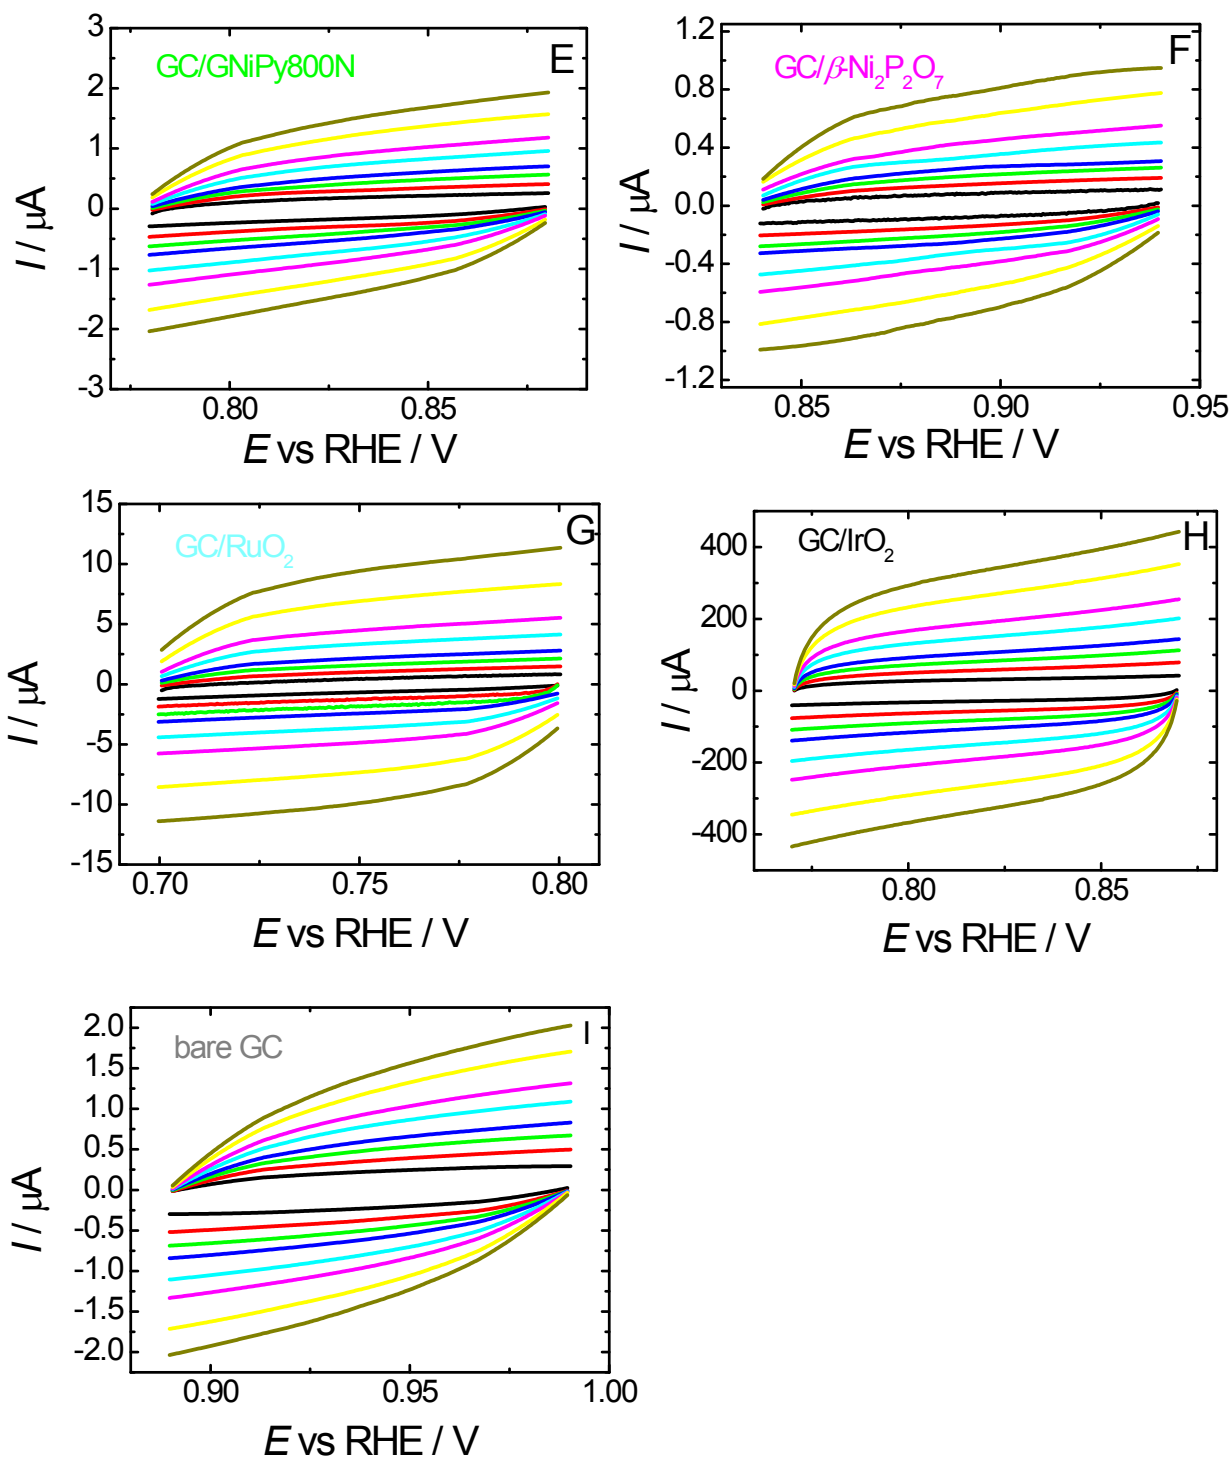

**Figure S21.** Cyclic voltammograms measured in a non-Faradaic potential region – which also consists of the open circuit potential (OCP) – for modified GC electrodes in  $N_2$ -saturated 1M KOH solution before OER. The modified electrodes were kept in each vertex potential for 10 sec before the onset of the next potential sweep. Scans were initiated at higher potentials.

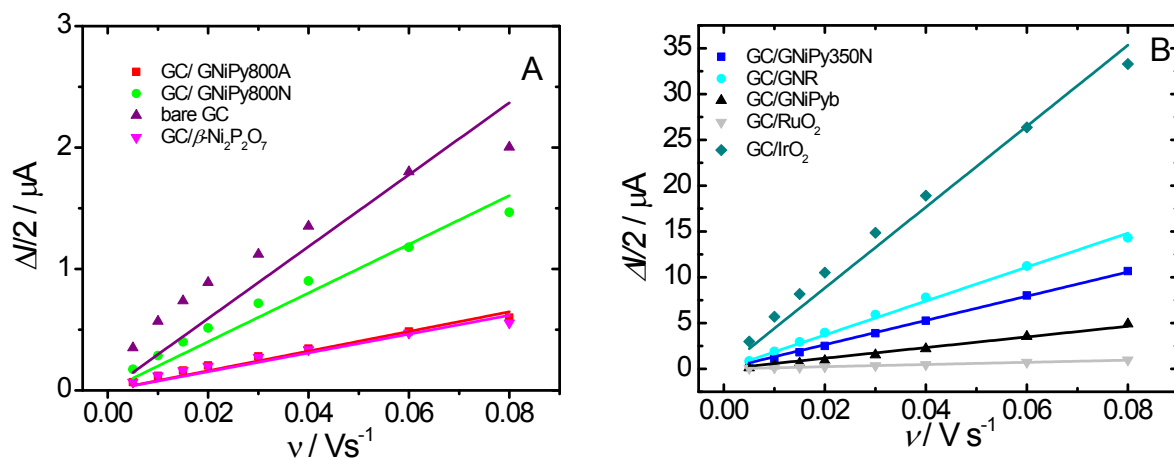

**Figure S22.** Plots related to differences between the anodic and the cathodic double layer charging currents (Figure S21, before OER) divided by 2 ( $\Delta I = I_a - I_c$ )/2), measured at the OCP, which is also in a non-Faradaic potential region, relative to the potential scan rates. The slopes of these plots yield the double-layer capacitance ( $C_{dl}$ ) values (see Table S7) used for determining the ECSA for the modified GC electrodes in  $N_2$ -saturated 1 M KOH solution.

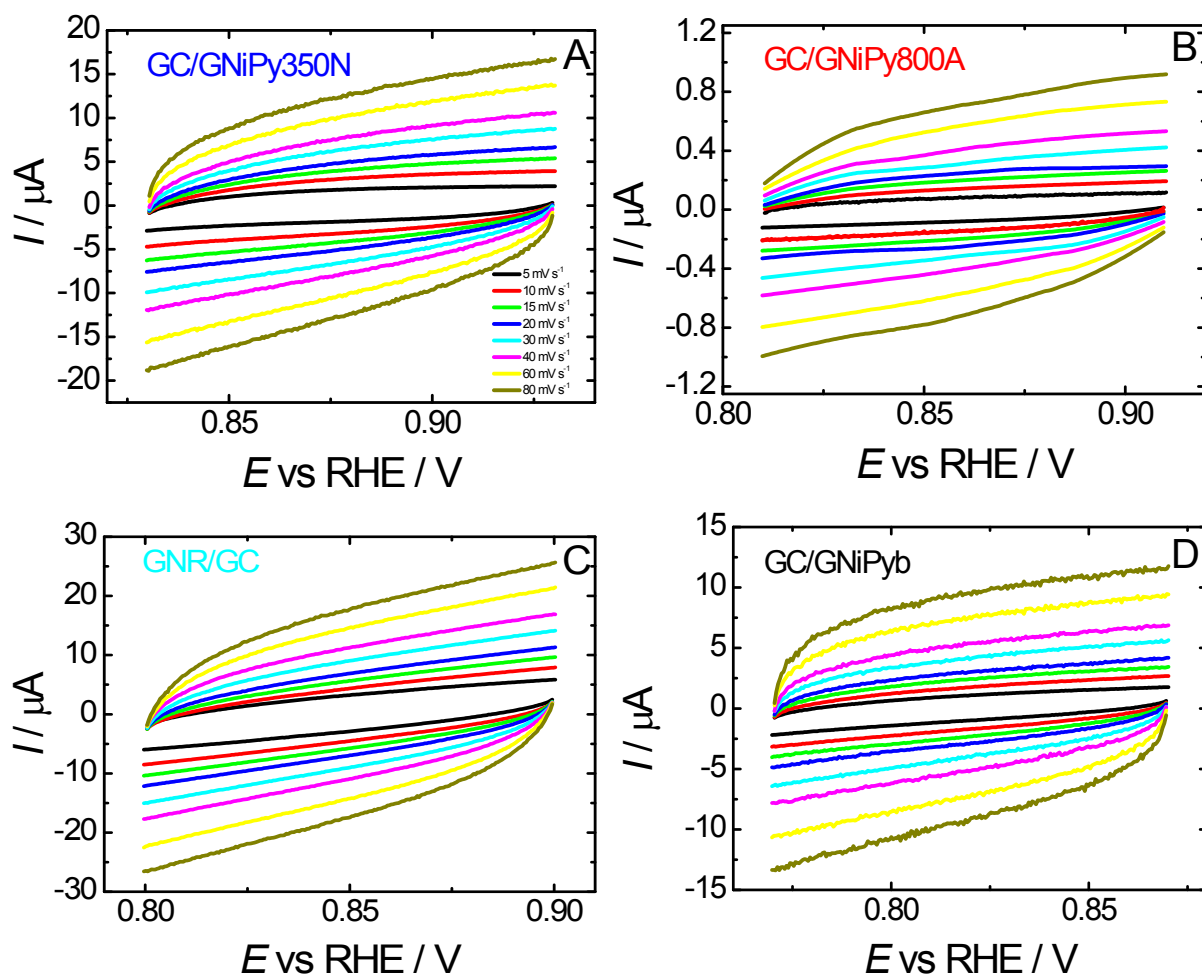

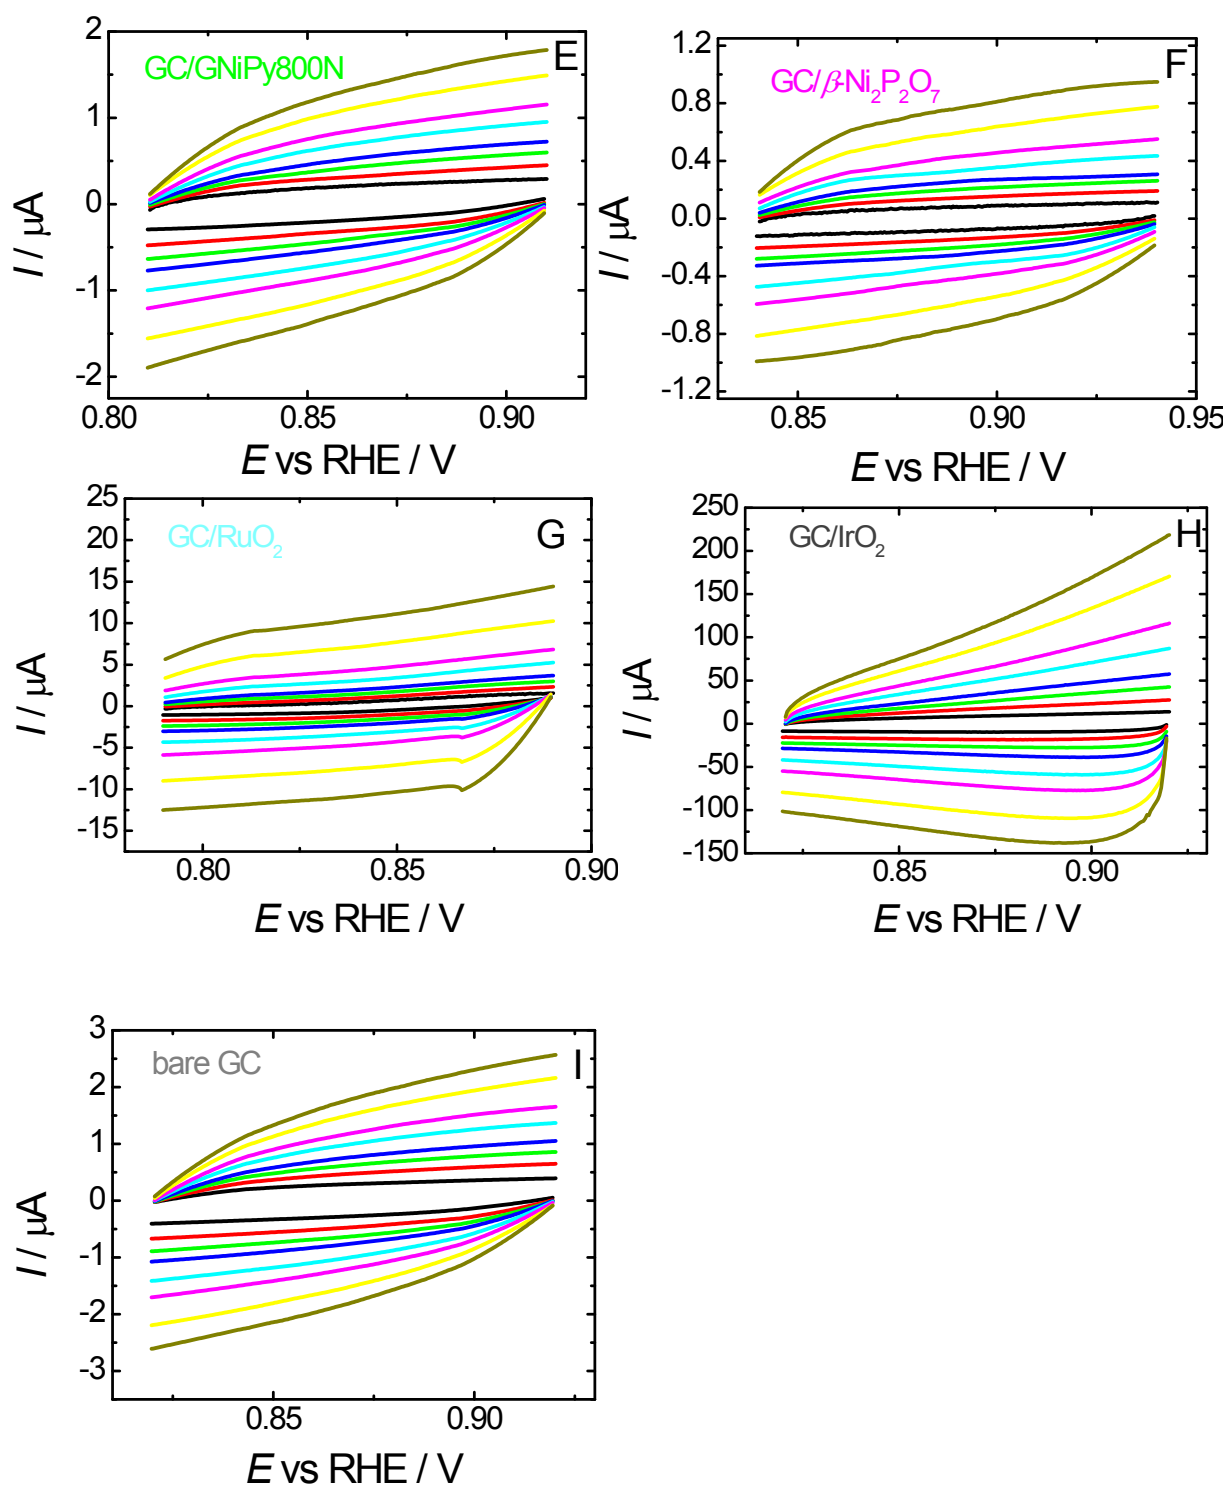

**Figure S23.** Cyclic voltammograms measured in a non-Faradaic potential region – which also consists of the open circuit potential (OCP) – for modified GC electrodes in  $N_2$ -saturated 1M KOH solution after OER. The modified electrodes were kept in each vertex potential for 10 sec before the onset of the next potential sweep. Scans were initiated at higher potentials.

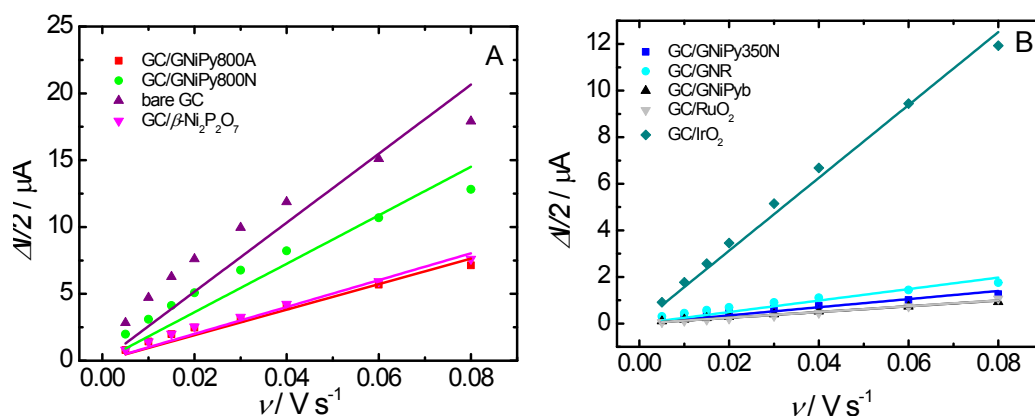

**Figure S24.** Plots related to differences between the anodic and the cathodic double layer charging currents (Figure S23 after OER) divided by 2 ( $\Delta I = I_a - I_c$ )/2, measured at the OCP, which is also in a non-Faradaic potential region, relative to the potential scan rates. The slopes of these plots yield the double-layer capacitance ( $C_{dl}$ ) values (see Table S7) used for determining the ECSA for the modified GC electrodes in  $N_2$ -saturated 1 M KOH solution.

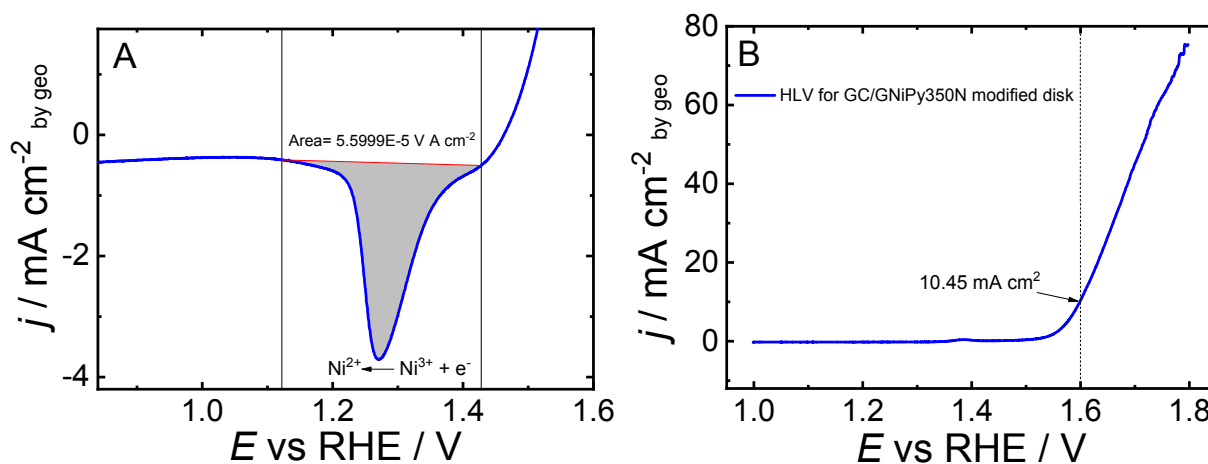

**Figure S25.** (A) Amplified part of Figure 7A showing the integrated area from the reduction peak used for determining  $Ni^{2+}$  surface active species. (B) Hydrodynamic linear potential scan for GC/GNiPy350N modified disk electrode at  $5 \text{ mV s}^{-1}$  and  $\omega=1600 \text{ rpm}$ . Potential scan was initiated at 1.0 V. The Pt ring current density was obtained by maintaining this electrode at 0.4 V while the modified GC disk electrode was scanned in the same solution at  $\omega=1600 \text{ rpm}$ . The data were all obtained in  $N_2$ -saturated 1.0 M KOH solution.

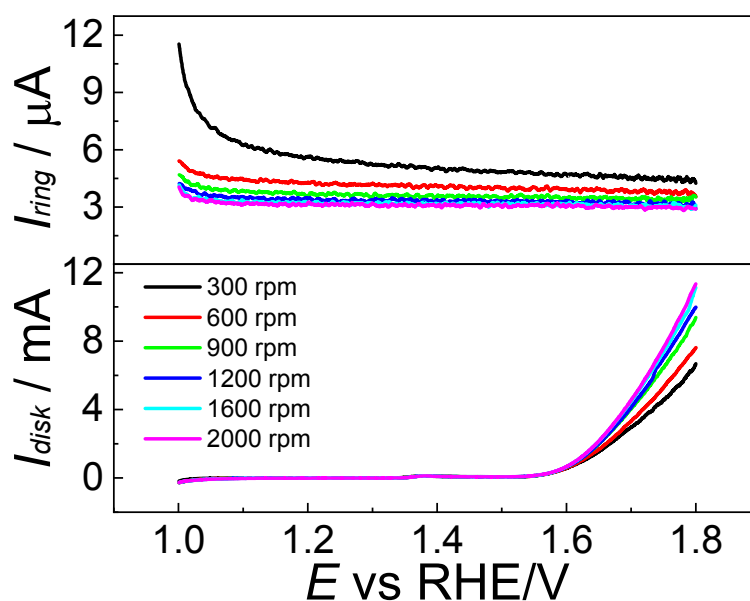

**Figure S26.** Hydrodynamic linear potential scan (HLS) curves for GC/GNiPy350N disk electrode obtained in  $N_2$ -saturated 1.0 M KOH solution. Scan rate:  $5 \text{ mV s}^{-1}$ . Scans were initiated at 1.0 V. The Pt ring current responses were obtained by keeping this electrode at 1.2 V while the modified GC disk electrode was scanned at different  $\omega$  values.

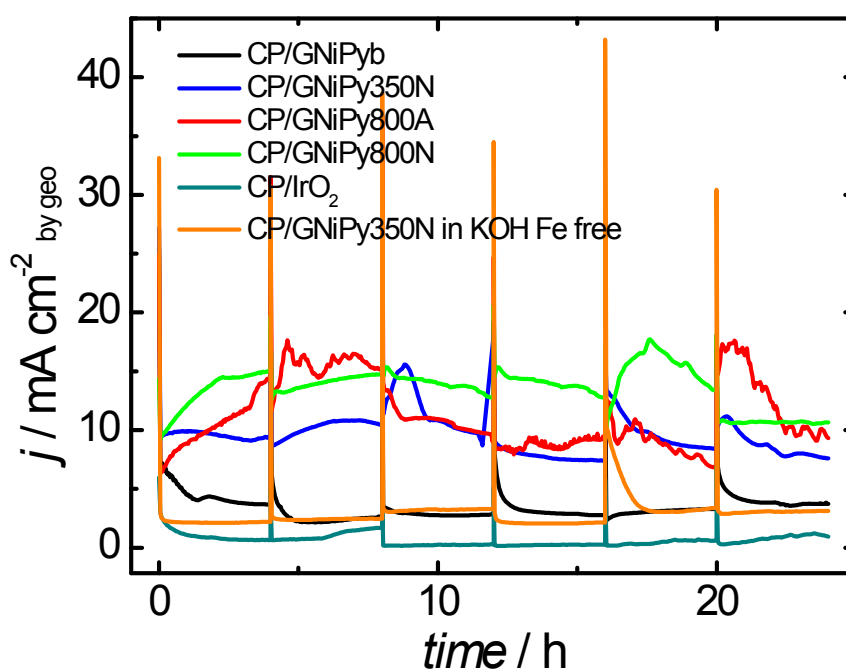

**Figure S27.** Chronoamperometries for GNiPyb, GNiPy350N, GNiPy800A, GNiPy800N and  $IrO_2$  modified CP electrodes at 1.60, 1.55, 1.62, 1.64, and 1.53 V, respectively, obtained in  $O_2$ -saturated 1.0 M KOH solution (potential at which the initial current was  $10 \text{ mA cm}^{-2}$  by geo) and CP/GNiPy350N electrode at 1.55 V obtained in  $O_2$ -saturated purified 1 M KOH solution (Fe free).



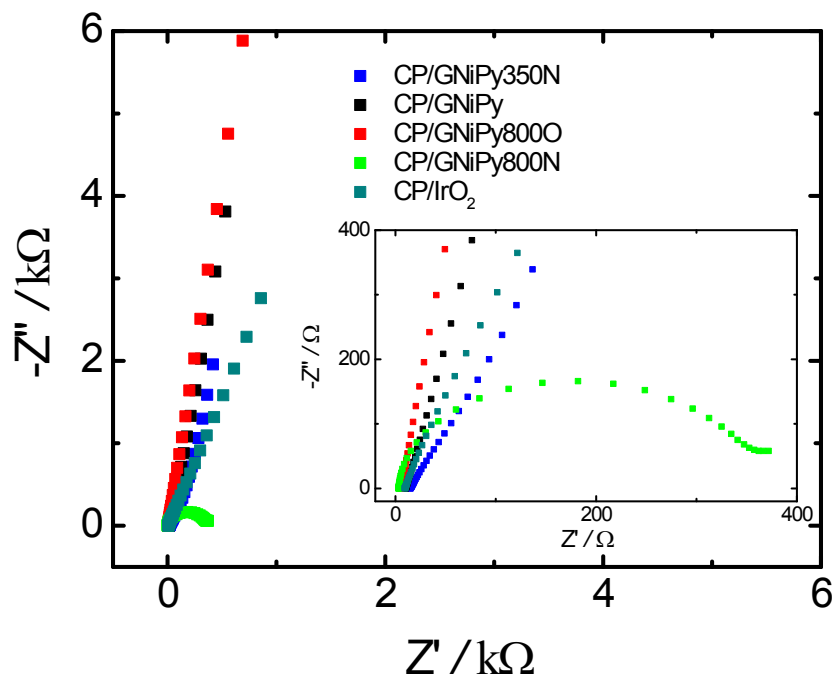

**Figure S28.** EIS results for bare and modified CP electrodes in N<sub>2</sub>-saturated 1 M KOH solution, after OER stability test. Potential perturbation: 10mV (rms). Frequency range: 100kHz – 10 mHz. Constant potential for EIS acquisition: OCP (0.90 V vs. RHE on average).

## References

- 1 L. Trotochaud, S. L. Young, J. K. Ranney, S. W. Boettcher, *J. Am. Chem. Soc.*, 2014, **136**, 6744–6753.
- 2 D. Kim, J. Kang, B. Yan, K.-D. Seong, Y. Piao, *ACS Sustainable Chem. Eng.*, 2020, **8**, 2843–2853.
- 3 H. J. Song, H. Yoon, B. Ju, D.-W. Kim, *J Am Ceram Soc.* 2020, **103**, 4748–4753.
- 4 N. R. Chodankar, I. V. Bagal, S.-W. Ryu, Y.-K. Han, D.-H. Kim, *ChemCatChem* 2019, **11**, 4256–4261.
- 5 Y. Xiao, S. Deng, M. Li, Q. Zhou, L. Xu, H. Zhang, D. Sun, Y. Tang, *Front. Chem.*, 2019, **7**, 523.
- 6 S. Surendran, A. Sivanantham, S. Shanmugam, U. Sim, R. K. Selvan, *Sustainable Energy Fuels*, 2019, **3**, 2435–2446.
- 7 S. J. Marje, P. K. Katkar, S. B. Kale, A. C. Lokhande, C. D. Lokhande, U. M. Patil, *J. Alloys Compd.*, 2019, **779**, 49–58.
- 8 E. Loni, M. H. Siadati, A. Shokuhfar, D. Leybo, D. Kuznetsov, *J. Solid State Chem*, 2020, **290**, 121510.
- 9 B. Li, R. Zhu, H. Xue, Q. Xu, H. Pang, *J. Colloid Interface Sci.*, 2020, **563**, 328–335.
- 10 H. J. Song, H. Yoon, B. Ju, D.-Y. Lee, D.-W. Kim, *ACS Catal.*, 2020, **10**, 702–709.
- 11 D. Liang, C. Lian, Q. Xu, M. Liu, H. Liu, H. Jiang, C. Li, *Appl. Catal. B-Environ.*, 2020, **268**, 118417.

- 12 R. Gond, S. P. V. P. Barpanda, *Chem. Commun.*, 2019, **55**, 11595—11598.
- 13 J.-T. Ren, G.-G. Yuan, L. Chen, C.-C. Weng, Z.-Y. Yuan, *ACS Sustainable Chem. Eng.*, 2018, **6**, 9793–9803.
- 14 H. Du, W. Ai, Z. L. Zhao, Y. Chen, X. Xu, C. Zou, L. Wu, L. Su, K. Nan, T. Yu, C. M. Li, *Small*, 2018, **14**, 1801068.
- 15 J. Wang, H. C. Zeng, *ACS Appl. Mater. Interfaces*, 2018, **10**, 6288–6298.
- 16 P. Feng, X. Cheng, J. Li, X. Luo, *ChemistrySelect*, 2018, **3**, 760–764.
- 17 M. Liu, Z. Qu, D. Yin, X. Chen, Y. Zhang, Y. Guo, D. Xiao, *ChemElectroChem*, 2018, **5**, 36–43.
